# Supplementary material for: A neurodegenerative disease landscape of rare mutations in Colombia due to founder effects
Source: PubMed Central journal article supplement (PMC8902761; doi:10.1186/s13073-022-01035-9), 2022-03-08
Supplement: 13073_2022_1035_MOESM1_ESM.pdf [file 13073_2022_1035_MOESM1_ESM.pdf]

**ADDITIONAL FILE 1  
SUPPLEMENTARY FIGURES**

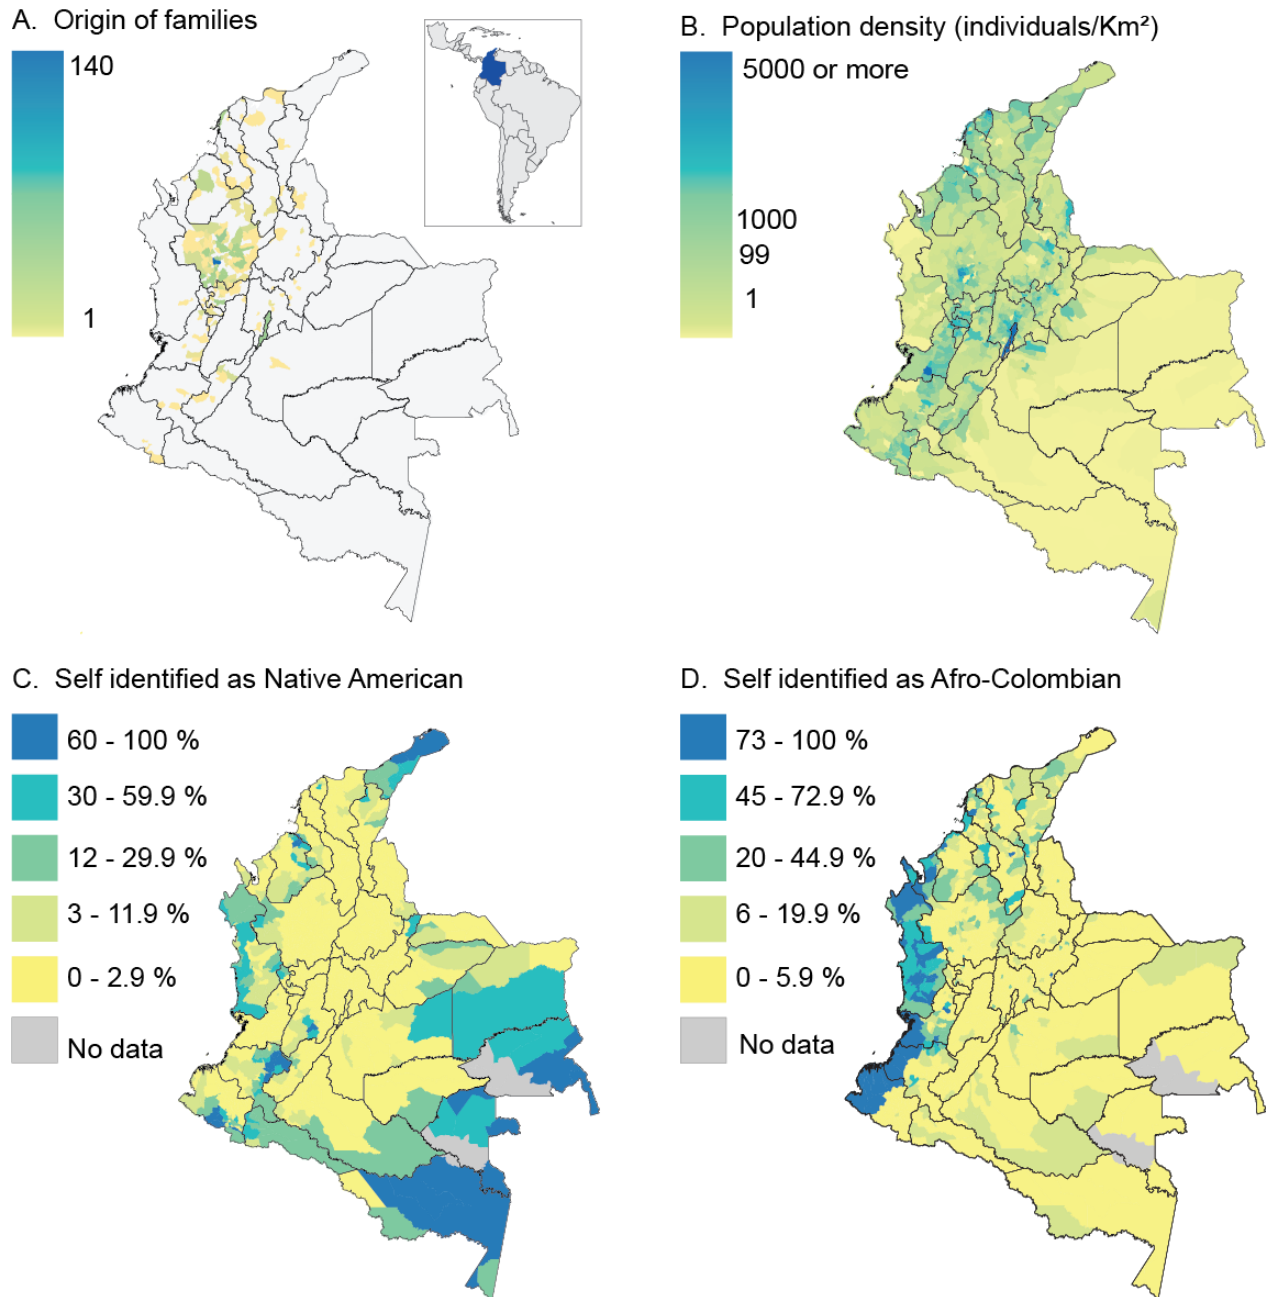

**Figure S1.**

**Demographic information of the TANGL cohort and the Colombian population:**

**(A)** Place of origin of the included families in the map of Colombia. **(B)** Population density in Colombia according to the 2018 census **(C and D)** Colombian population that self identifies as Native American or Afro-Colombian according to the 2005 census. Census data from 2018 and 2005 is publicly available by the “Departamento Administrativo Nacional de Estadística DANE”: [www.dane.gov.co](http://www.dane.gov.co)

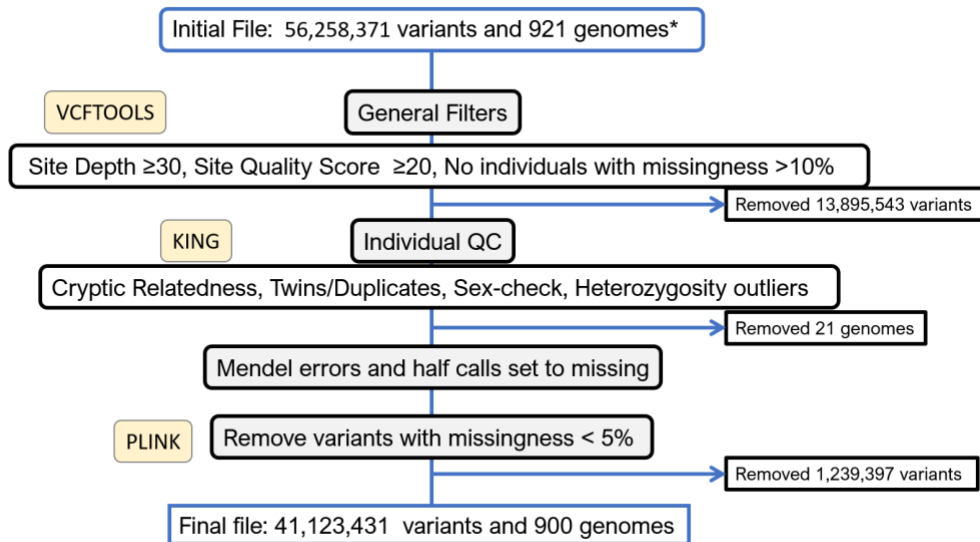

\*2 individuals were sequenced twice

26

**Figure S2:  
Pipeline for whole genome sequence data quality control (QC)**

The initial cohort included 919 individuals, but only 900 high quality genomes from 900 individuals were used for analyses in this project.

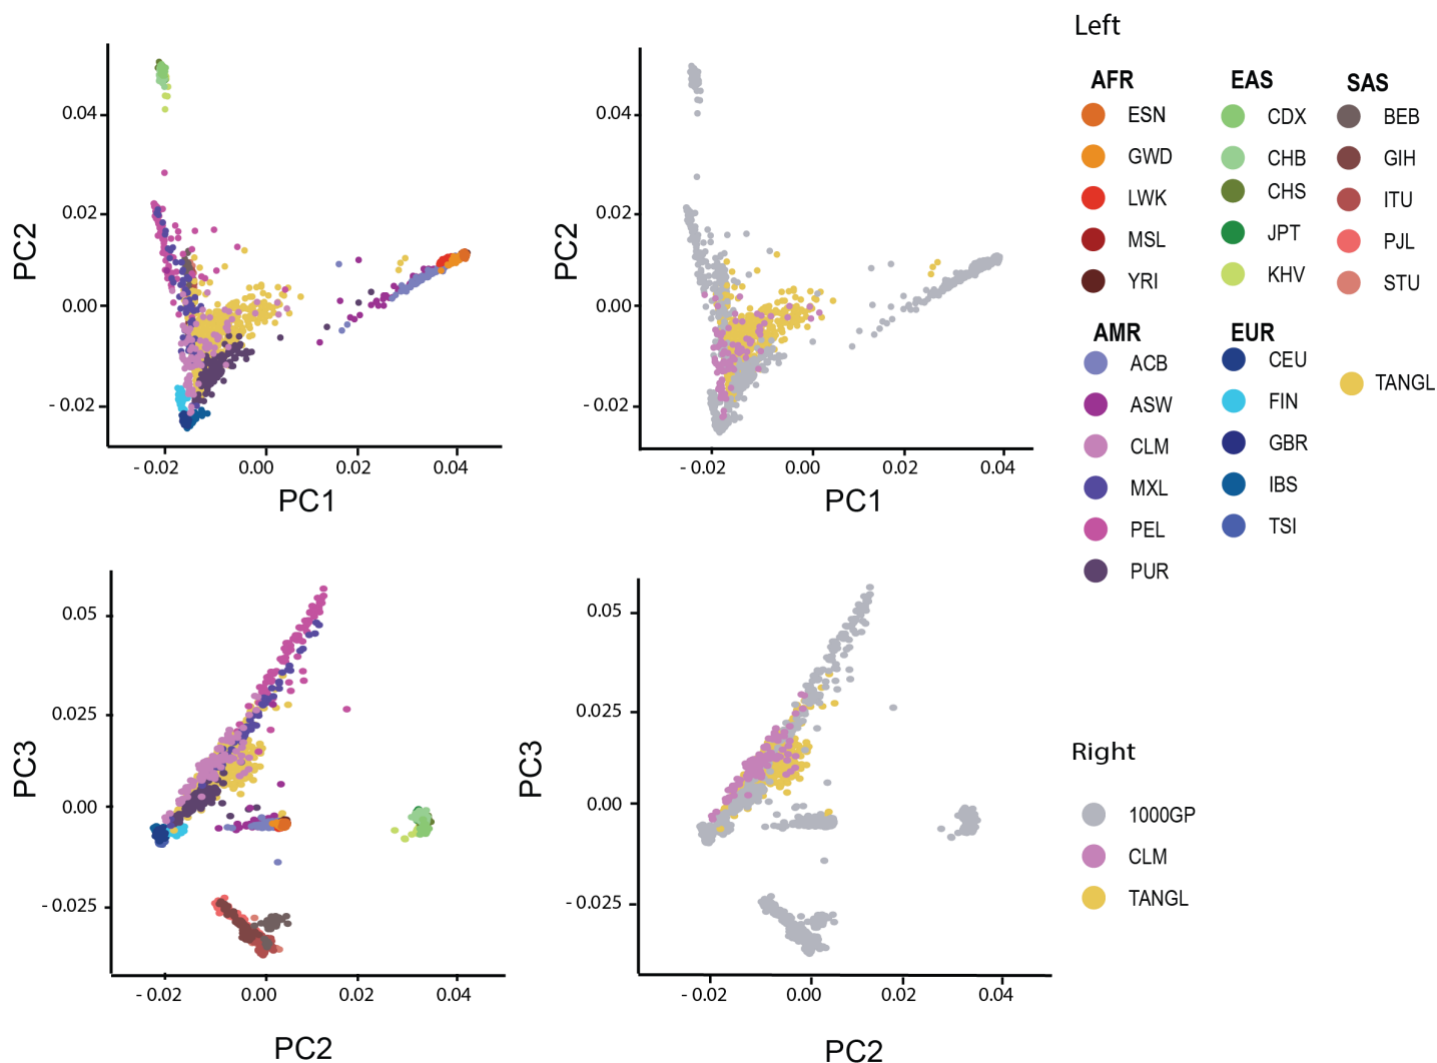

**Figure S3.**  
**Principal Component Analysis of whole genomes from 1000 Genomes project and the TANGL cohort.**

ESN: Esan in Nigeria. GWD: Gambian in Western Divisions in the Gambia. LWK: Luhya in Webuye, Kenya. MSL: Mende in Sierra Leone. YRI: Yoruba in Ibadan, Nigeria. ACB: African Caribbean in Barbados. ASW: Americans of African Ancestry SW USA. CLM: Colombians from Medellin, Colombia. MXL: Mexican Ancestry from Los Angeles USA. PEL: Peruvians from Lima, Peru. PUR: Puerto Ricans from Puerto Rico. CDX: Chinese Dai in Xishuangbanna, China. CHB: Han Chinese in Beijing, China. CHS: Southern Han Chinese. JPT: Japanese in Tokyo, Japan. KHV: Kinh in Ho Chi Minh City, Vietnam. CEU: Utah Residents with Northern and Western European Ancestry. FIN: Finnish in Finland. GBR: British in England and Scotland. IBS: Iberian Population in Spain. TSI: Toscani in Italia. BEB: Bengali from Bangladesh. GIH: Gujarati Indian from Houston, Texas. ITU: Indian Telugu from the UK. PJL: Punjabi from Lahore, Pakistan. STU: Sri Lankan Tamil from the UK

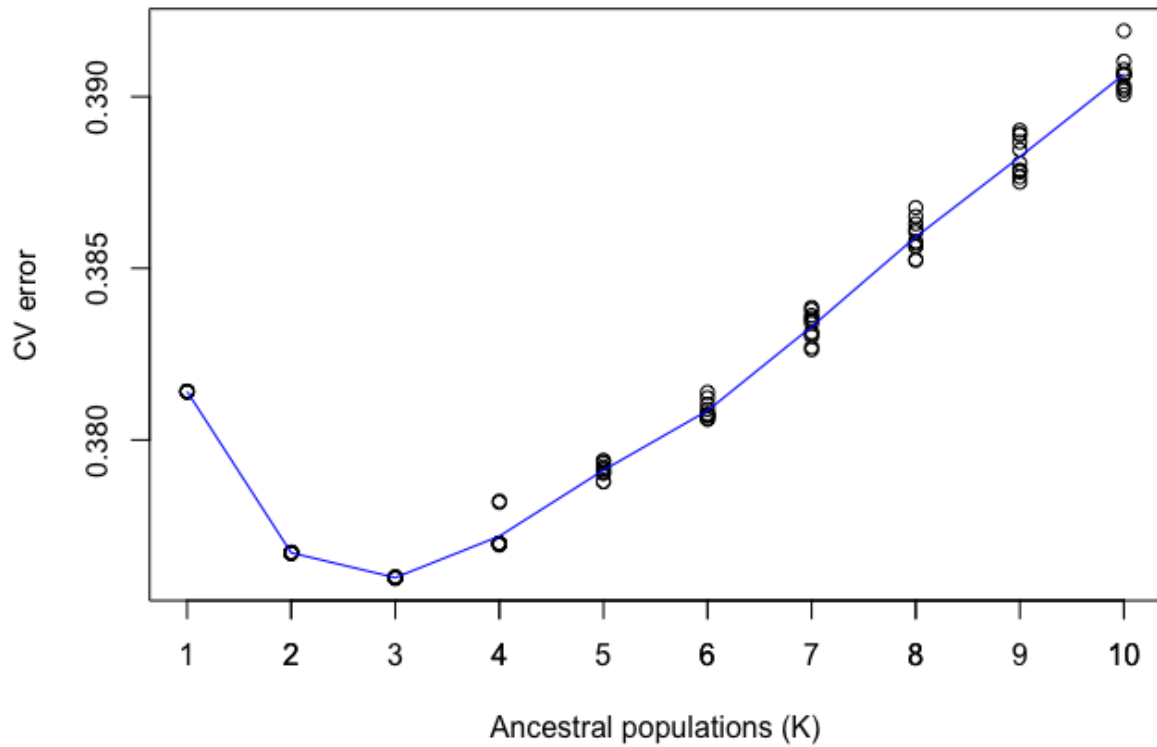

**Figure S4.**

**Cross validation error for unsupervised ADMIXTURE clustering analysis of the TANGL cohort probands.**

Y-axis represents the Cross-validation error calculated by each iteration of ADMIXTURE. Minimum cross validation error was identified at K = 3.

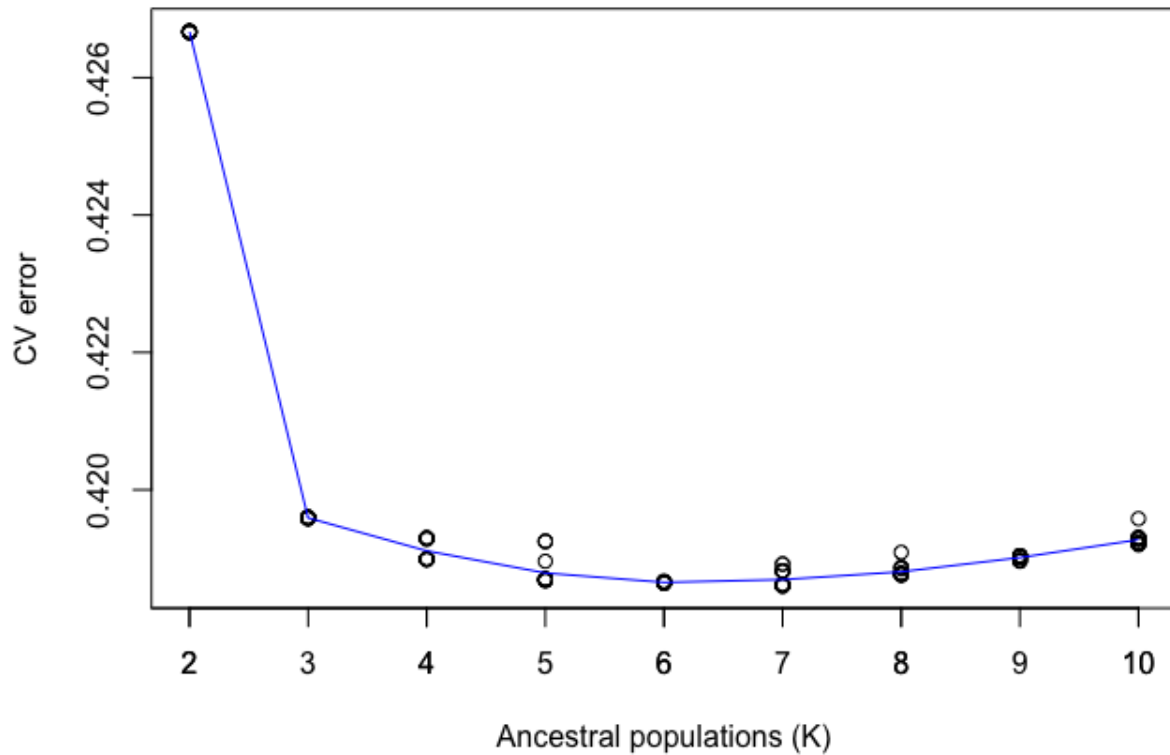

**Figure S5.**

**Cross Validation Error for unsupervised ADMIXTURE clustering of the multi-ancestral dataset (TANGL genomes with the European and African populations from the 1000GP and Native American genomes from Mao et al<sup>34</sup>).**

Y axis represents the Cross-validation error calculated by each iteration of ADMIXTURE. Minimum cross validation error was identified at K = 6.

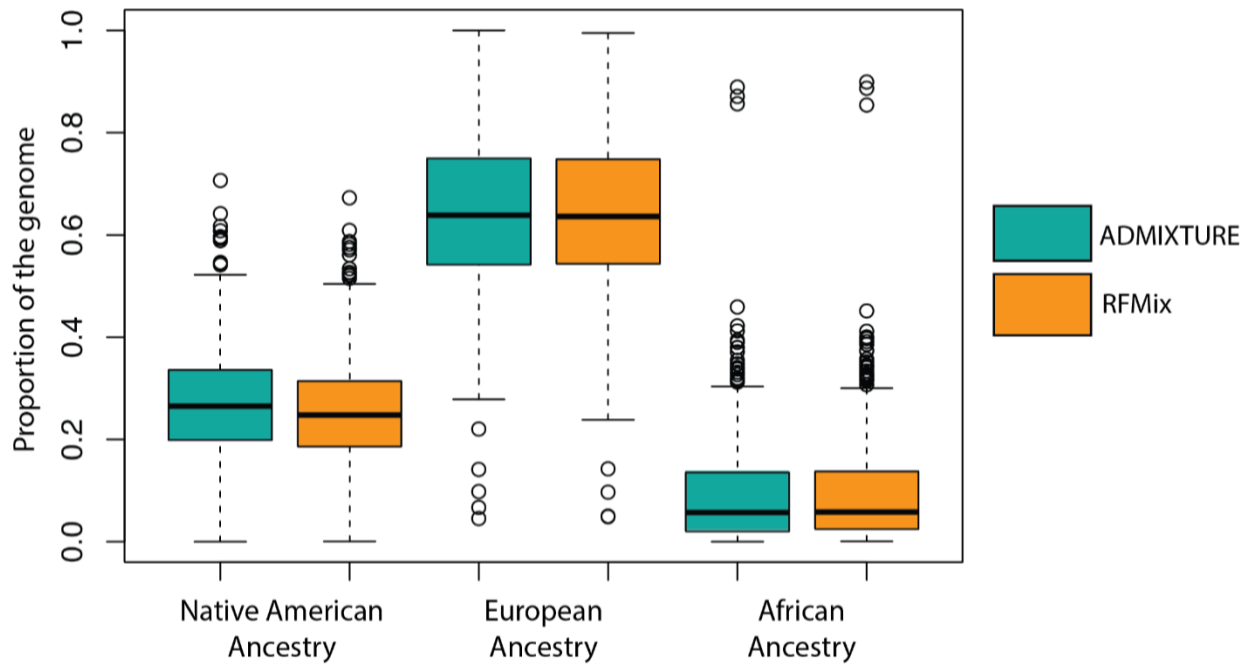

**Figure S6.** Global ancestry proportions of the TANGL cohort calculated by ADMIXTURE and sum of RFMix local ancestry estimation.

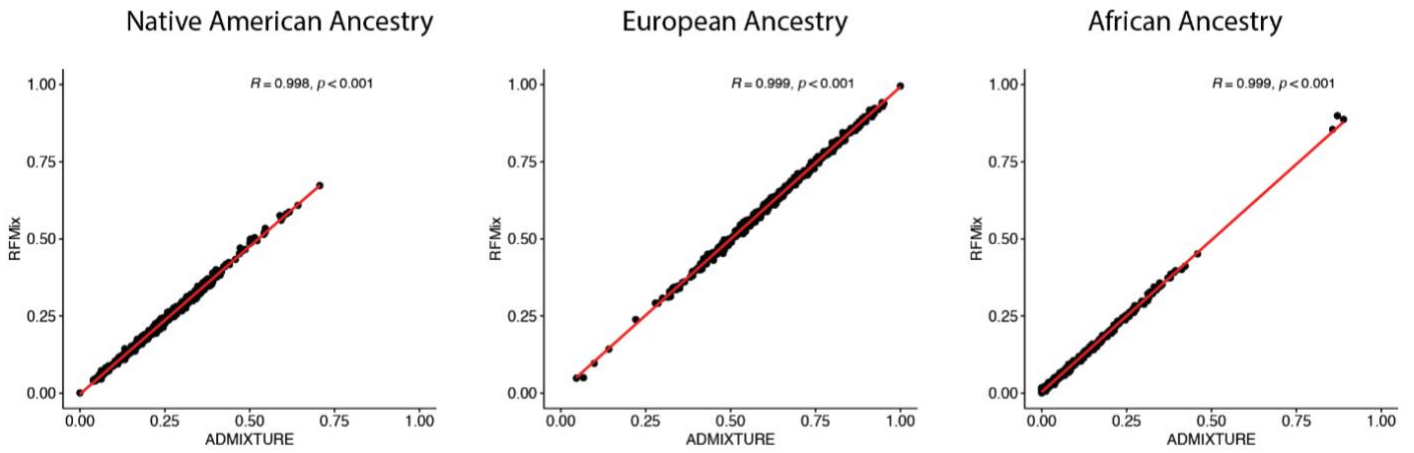

**Figure S7**

**Correlation of global ancestry proportions calculated for each individual by two different software, RFMix sum of local ancestries (Y axis) vs ADMIXTURE (X axis).**

R: Pearson correlation coefficient

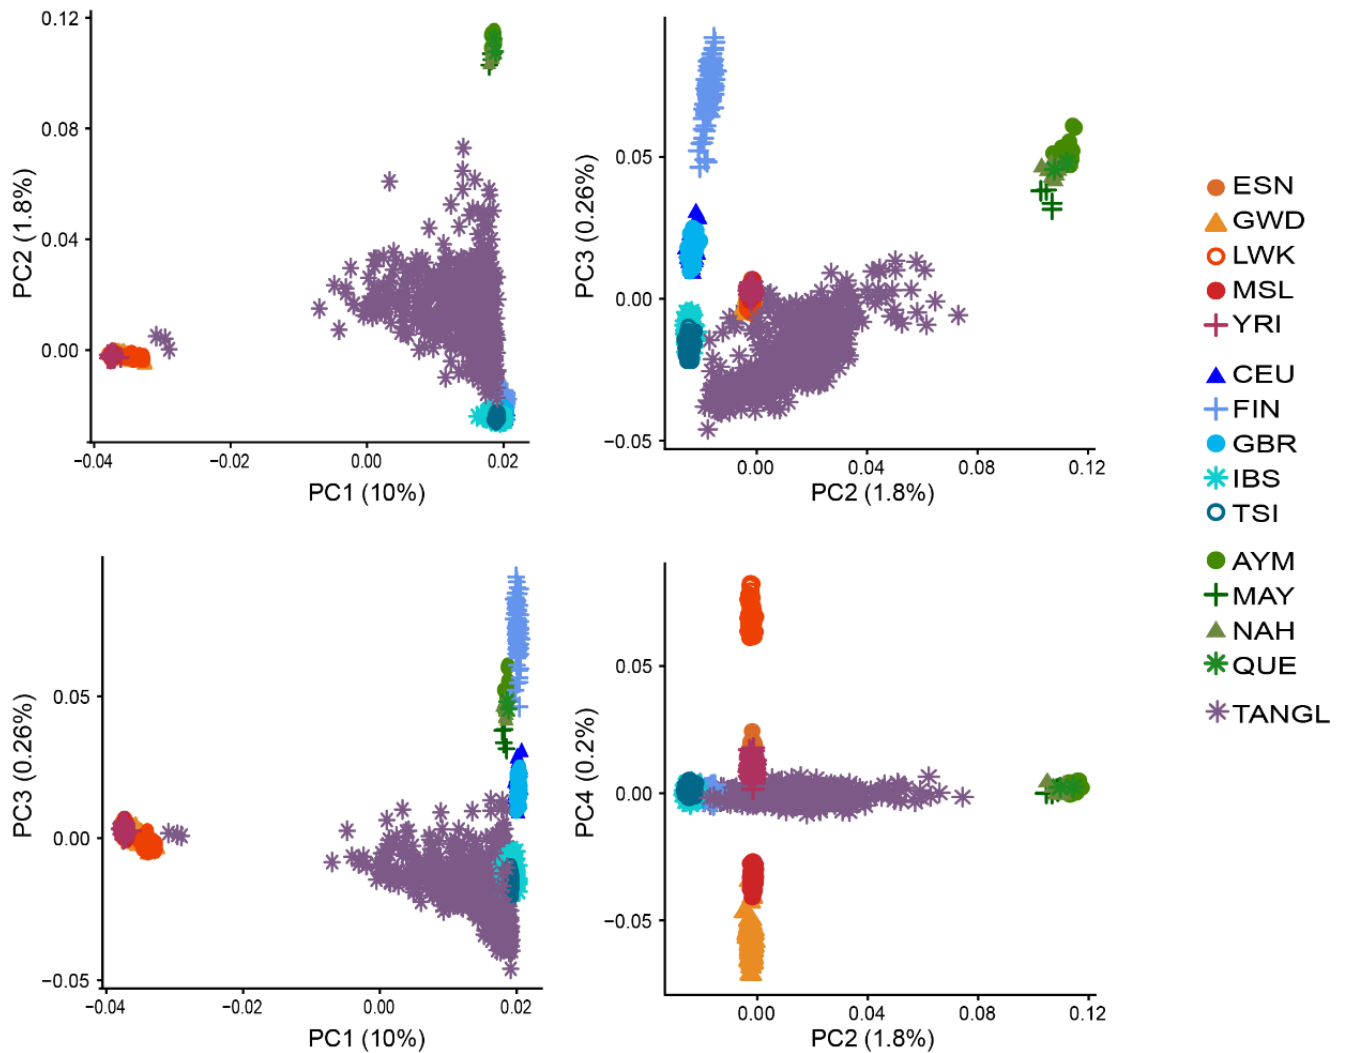

**Figure S8**

**Principal component analyses of the African and European cohorts of the 1000GP, along with 43 Native American genomes and the TANGL cohort.**

African are displayed in orange, European in blue, native American in Green and TANGL in purple. ESN: Esan in Nigeria. GWD: Gambian in Western Divisions in the Gambia. LWK: Luhya in Webuye, Kenya. MSL: Mende in Sierra Leone. YRI: Yoruba in Ibadan, Nigeria. CEU: Utah Residents (CEPH) with Northern and Western European Ancestry. FIN: Finnish in Finland. GBR: British in England and Scotland. IBS: Iberian Population in Spain. TSI: Toscani in Italia. AYM: Aymara. MAY: Mayan, NAH: Náhuatl. QUE: Quechua.



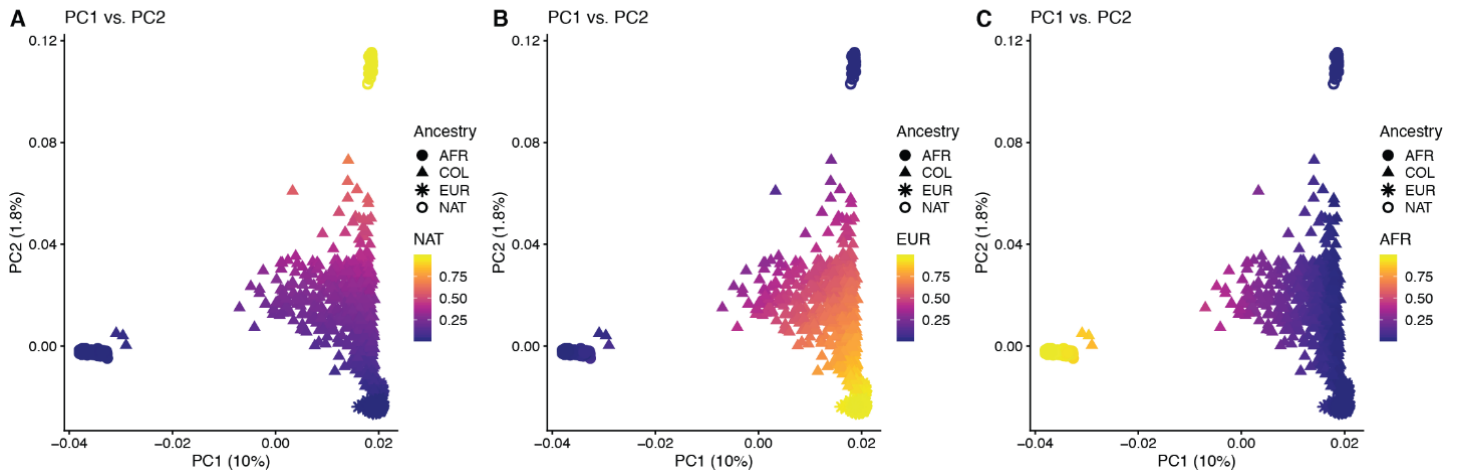

**Figure S9**

**Principal component analyses of the African and European cohorts of the 1000GP, along with 43 native American genomes and the TANGL cohort colored according to their proportions of global ancestry.**

Individuals are colored according to their proportion of the genome estimated to be Native American (A), European (B) and African (C) by ADMIXTURE at K=3. AFR: African, COL: Colombian, EUR: European, NAT: Native American

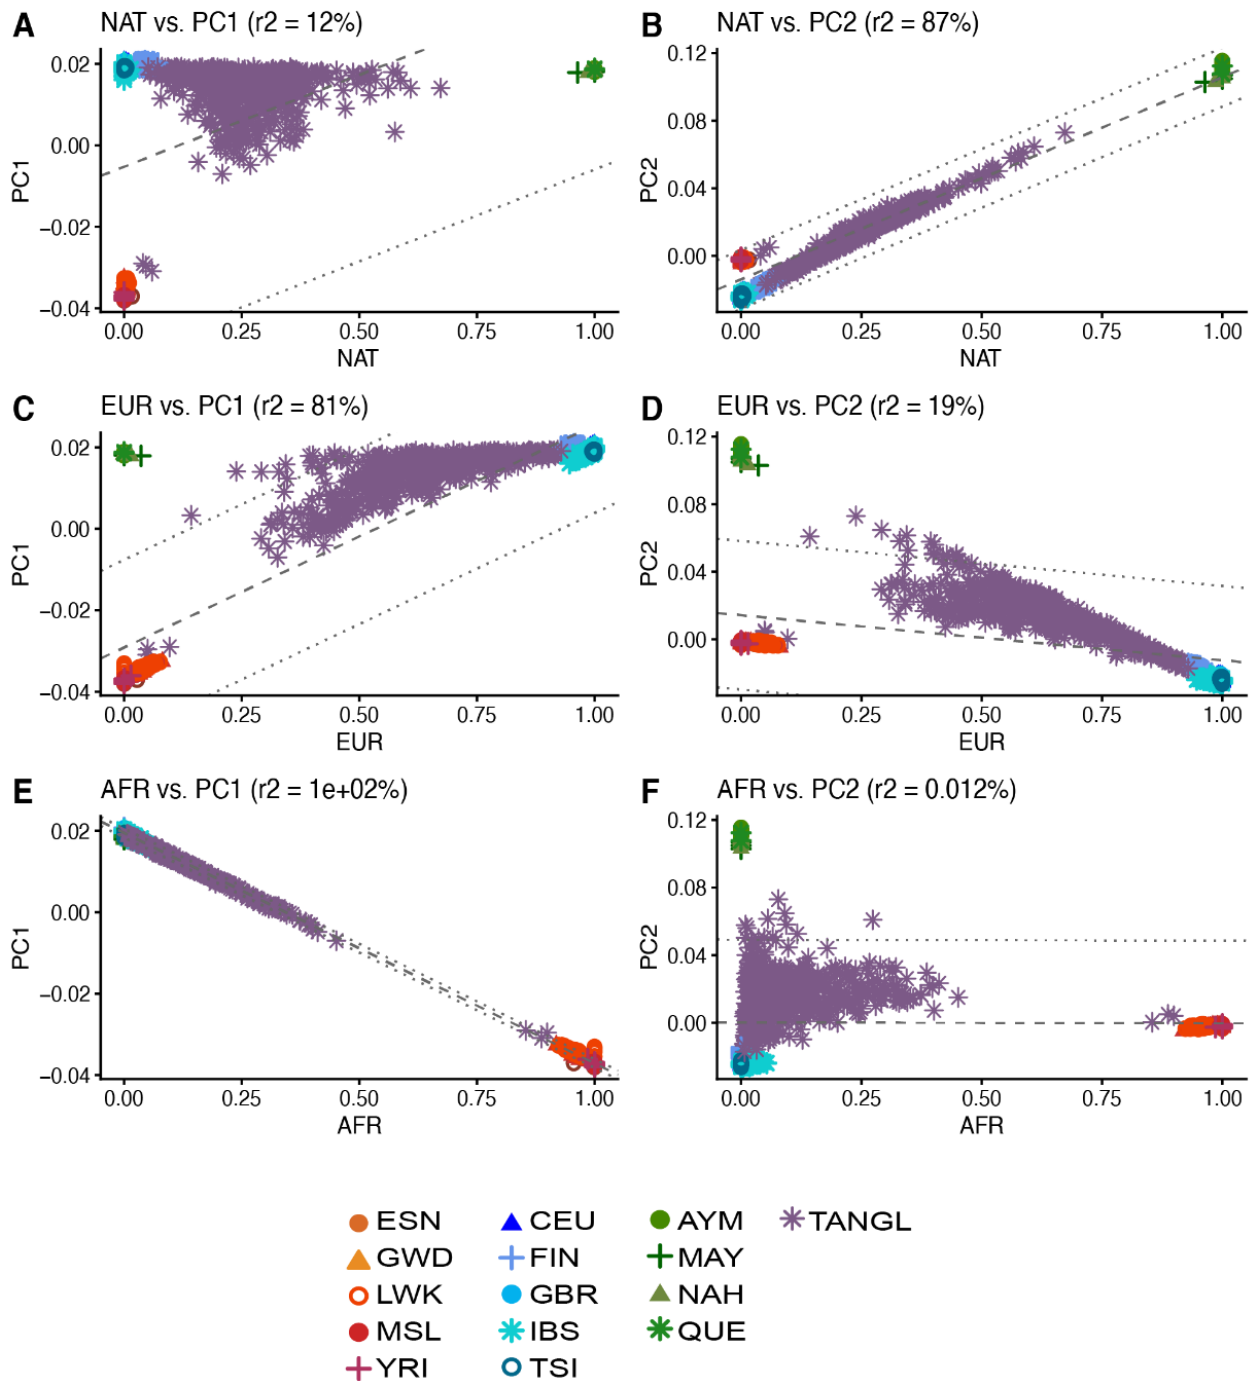

**Figure S10**

**Correlation of the principal component 1 and 2 values and the global ancestry proportions. For the TANGL.AFR.EUR.NAT cohort**

Correlation of global ancestry proportion of the genome estimated to be Native American (**A and B**), European (**C and D**) and African (**E and F**) by ADMIXTURE at K=3 with principal component 1 (**A, C and E**) and principal component 2 (**B, D and F**). AFR: African (orange), EUR: European (blue), NAT: Native American (green).  $r^2$ : Pearson's coefficient of determination. ESN: Esan in Nigeria. GWD: Gambian in Western Divisions in the Gambia. LWK: Luhya in Webuye, Kenya. MSL: Mende in Sierra Leone. YRI: Yoruba in Ibadan, Nigeria. CEU: Utah Residents (CEPH) with Northern and Western European Ancestry. FIN: Finnish in Finland. GBR: British in England and Scotland. IBS: Iberian Population in Spain. TSI: Toscani in Italia. AYM: Aymara. MAY: Mayan, NAH: Náhuatl. QUE: Quechua.

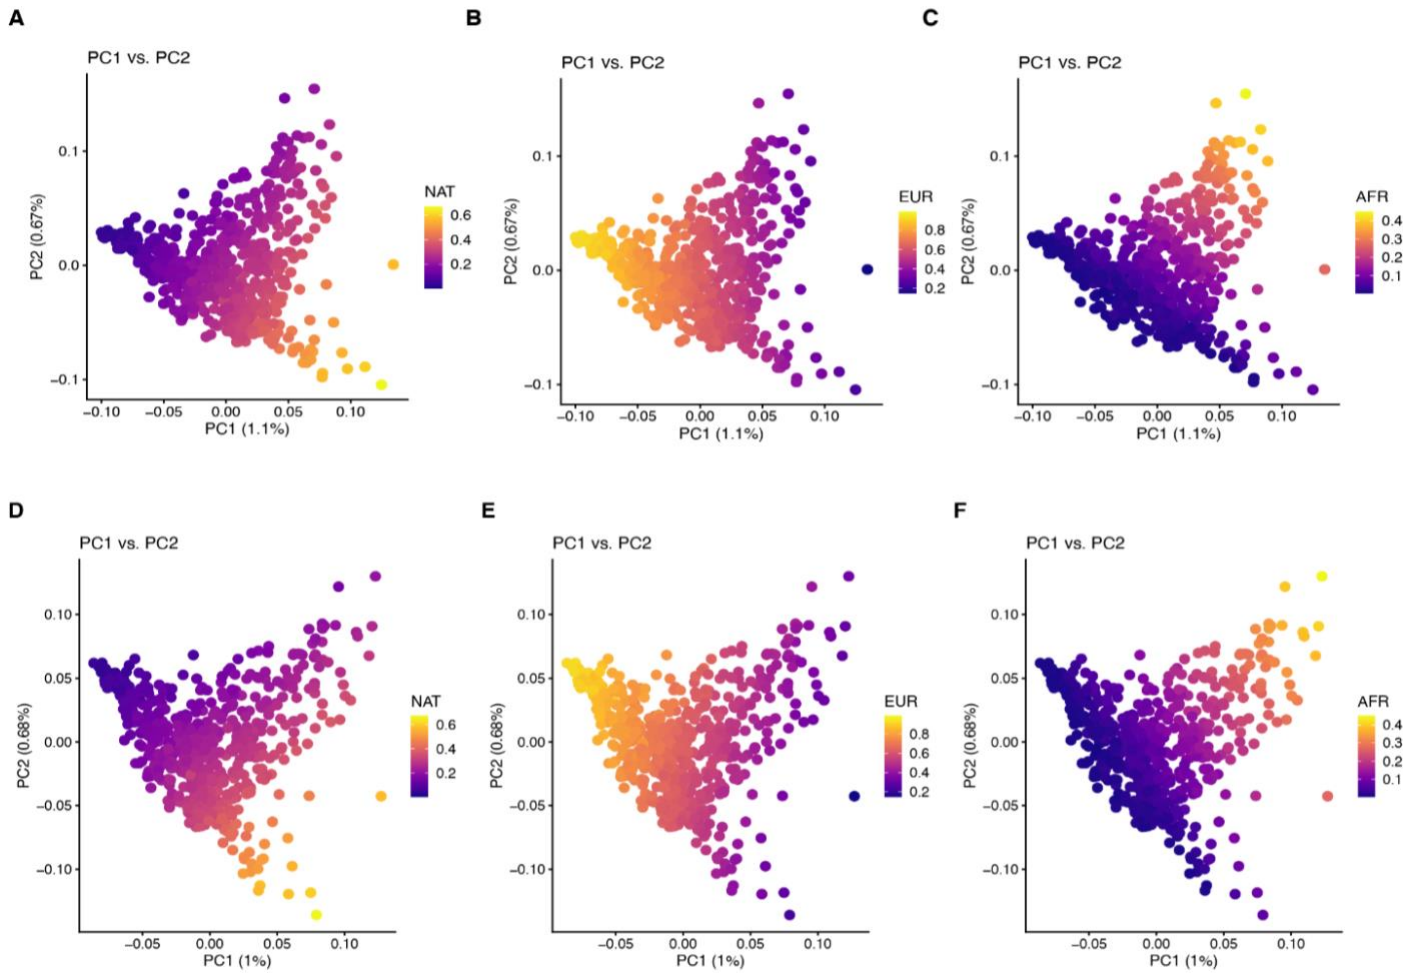

**Figure S11**

**Principal component analyses of the TANGL cohort colored according to their proportions of global ancestry.**

Principal component analyses TANGL cohort retaining variants with MAF >10% (**A, B and C**) and MAF between 5 – 10% (**D, E and F**). Individuals are colored according to their proportion of the genome estimated to be Native American (**A and D**), European (**B and E**) and African (**C and F**) by ADMIXTURE at K=3. AFR: African, COL: Colombian, EUR: European, NAT: Native American

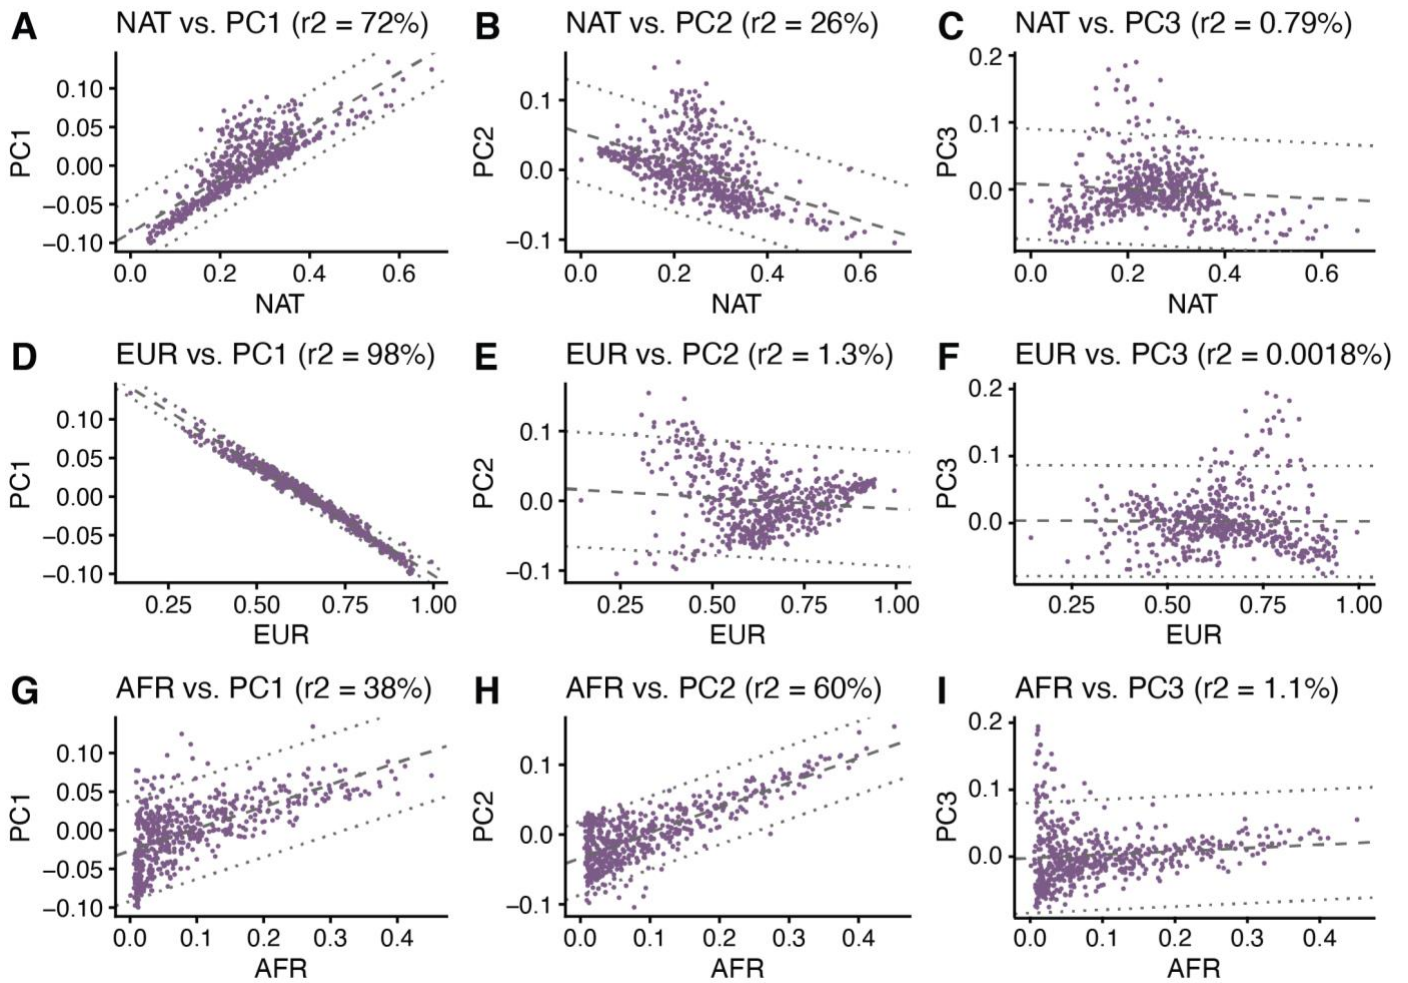

**Figure S12**

**Correlation of the principal component 1 and 2 values and the global ancestry proportions for the TANGL cohort using common variants (MAF >10%).**

Correlation of global ancestry proportion of the genome estimated to be Native American (**A, B and C**), European (**D, E and F**) and African (**G, H and I**) by ADMIXTURE at K=3 with Principal components calculated with variants of MAF >10%. Ancestral proportion vs principal component 1 (**A, D and G**), principal component 2 (**B, E and H**) and principal component 3 (**C, F and I**). AFR: African, EUR: European, NAT: Native American.  $r^2$ : Pearson's coefficient of determination.

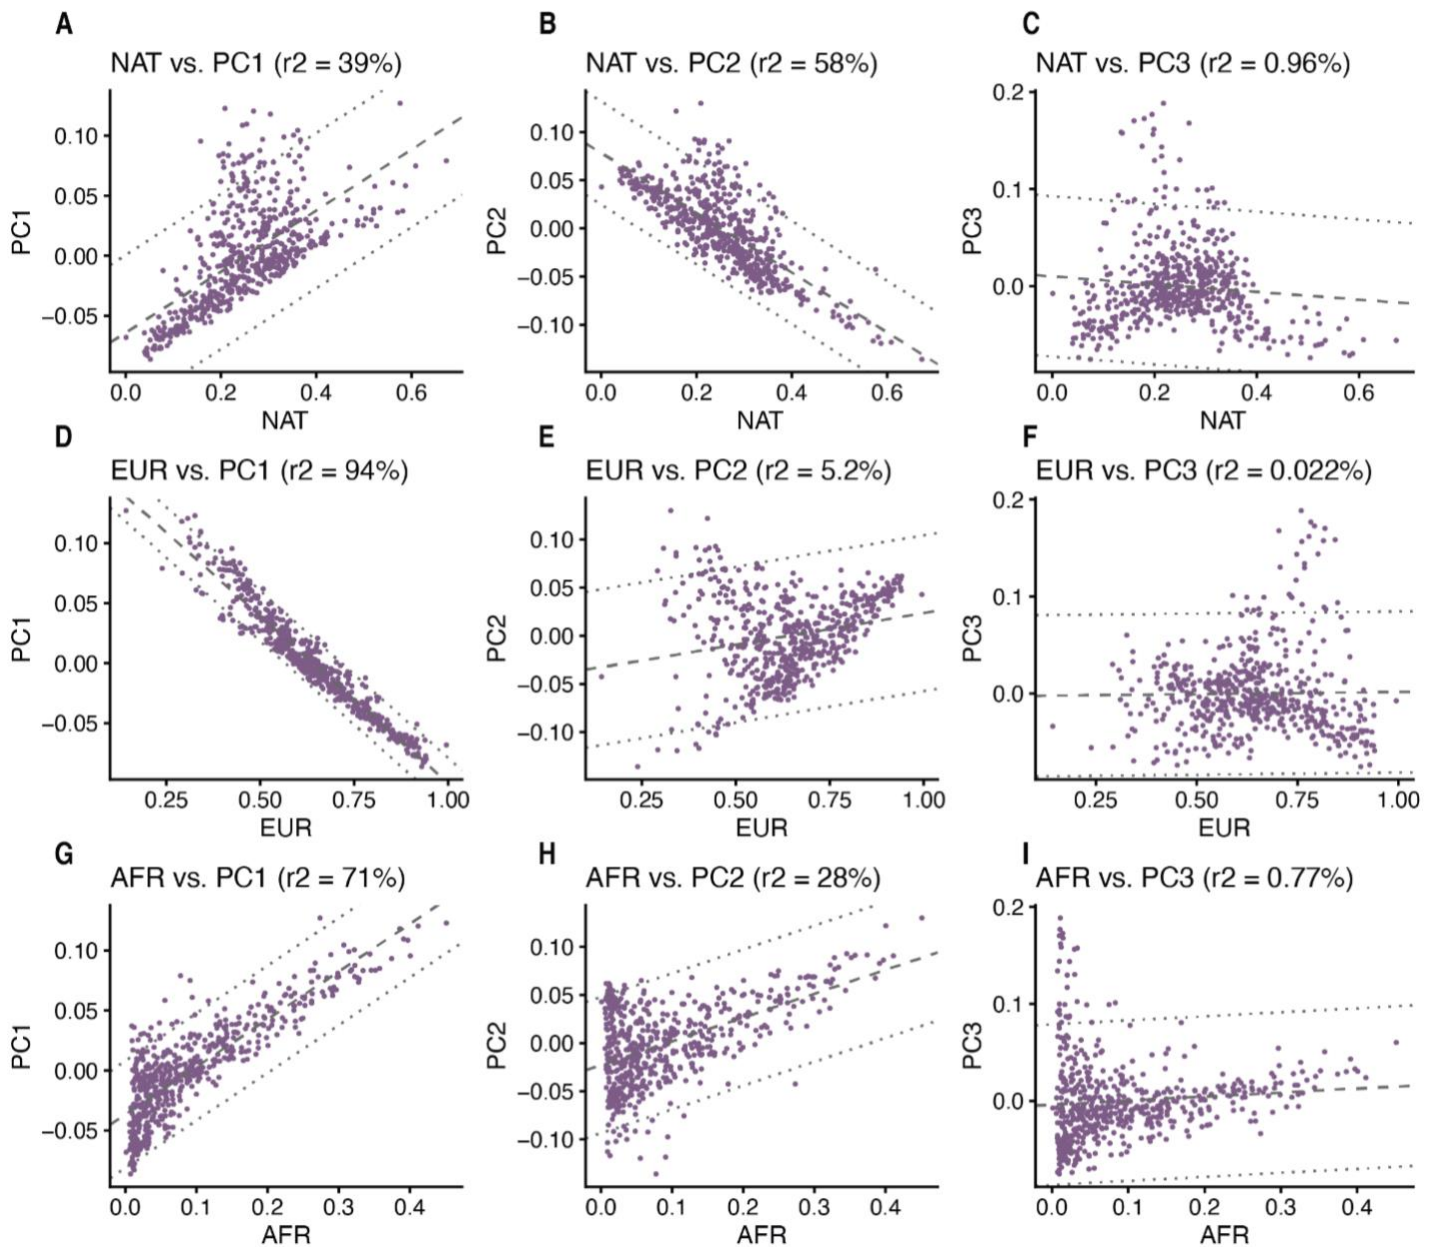

**Figure S13**

**Correlation of the principal component 1 and 2 values and the global ancestry proportions for the TANGL cohort using common variants (MAF 5-10%).**

Correlation of global ancestry proportion of the genome estimated to be Native American (**A, B and C**), European (**D, E and F**) and African (**G, H and I**) by ADMIXTURE at  $K=3$  with Principal components calculated with variants of MAF 5 - 10%. Ancestral proportion vs principal component 1 (**A, D and G**), principal component 2 (**B, E and H**) and principal component 3 (**C, F and I**). AFR: African, EUR: European, NAT: Native American.  $r^2$  : Pearson's coefficient of determination.

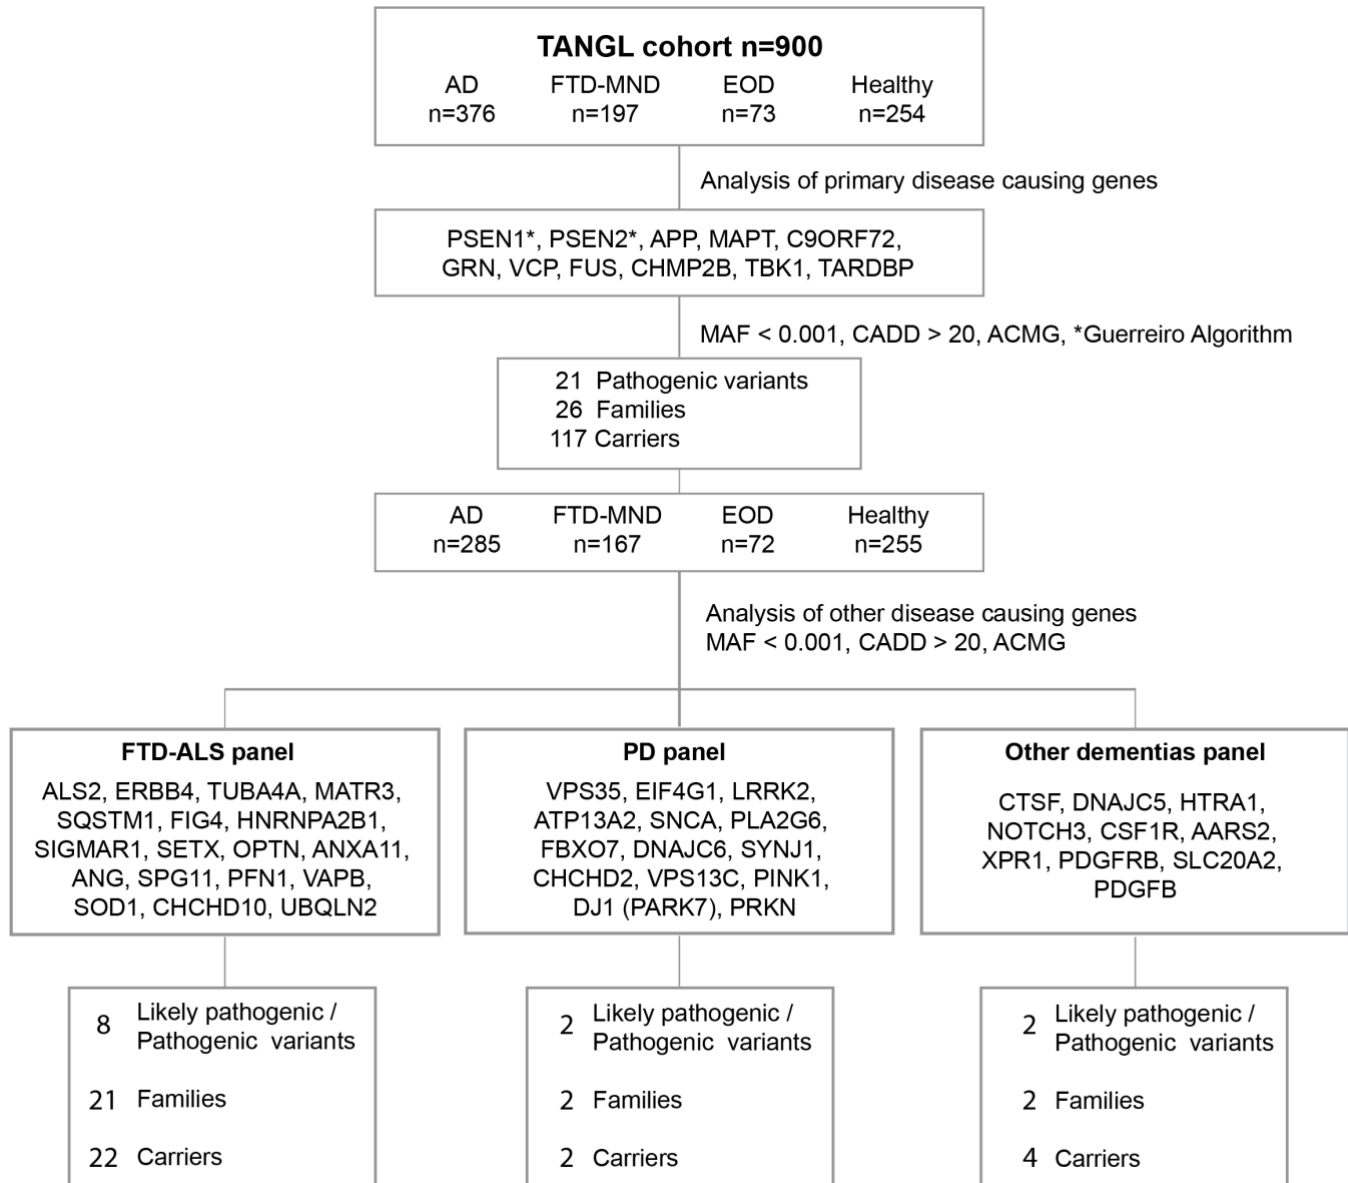

**Figure S14**

**Pipeline of the curation of disease-causing variants in the TANGL cohort.**

Genes associated with AD and FTD were selected from the AD/FTD mutation databases (<https://www.molgen.vib-ua.be/ADMutations> and <https://www.alzforum.org/mutations>). A secondary genetic analysis was done to identify possibly pathogenic variants in other genes associated with similar or overlapping phenotypes. For the secondary screening, the disease-causing genes included were those reported in the following OMIM phenotype series and phenotypes: Frontotemporal dementia and/or Amyotrophic Lateral Sclerosis (PS105550, PS167320, PS105400), Parkinson disease (PS168600), Adult-Onset Leukoencephalopathies (PS125310, 221820) and, Ceroid lipofuscinoses (PS256730).

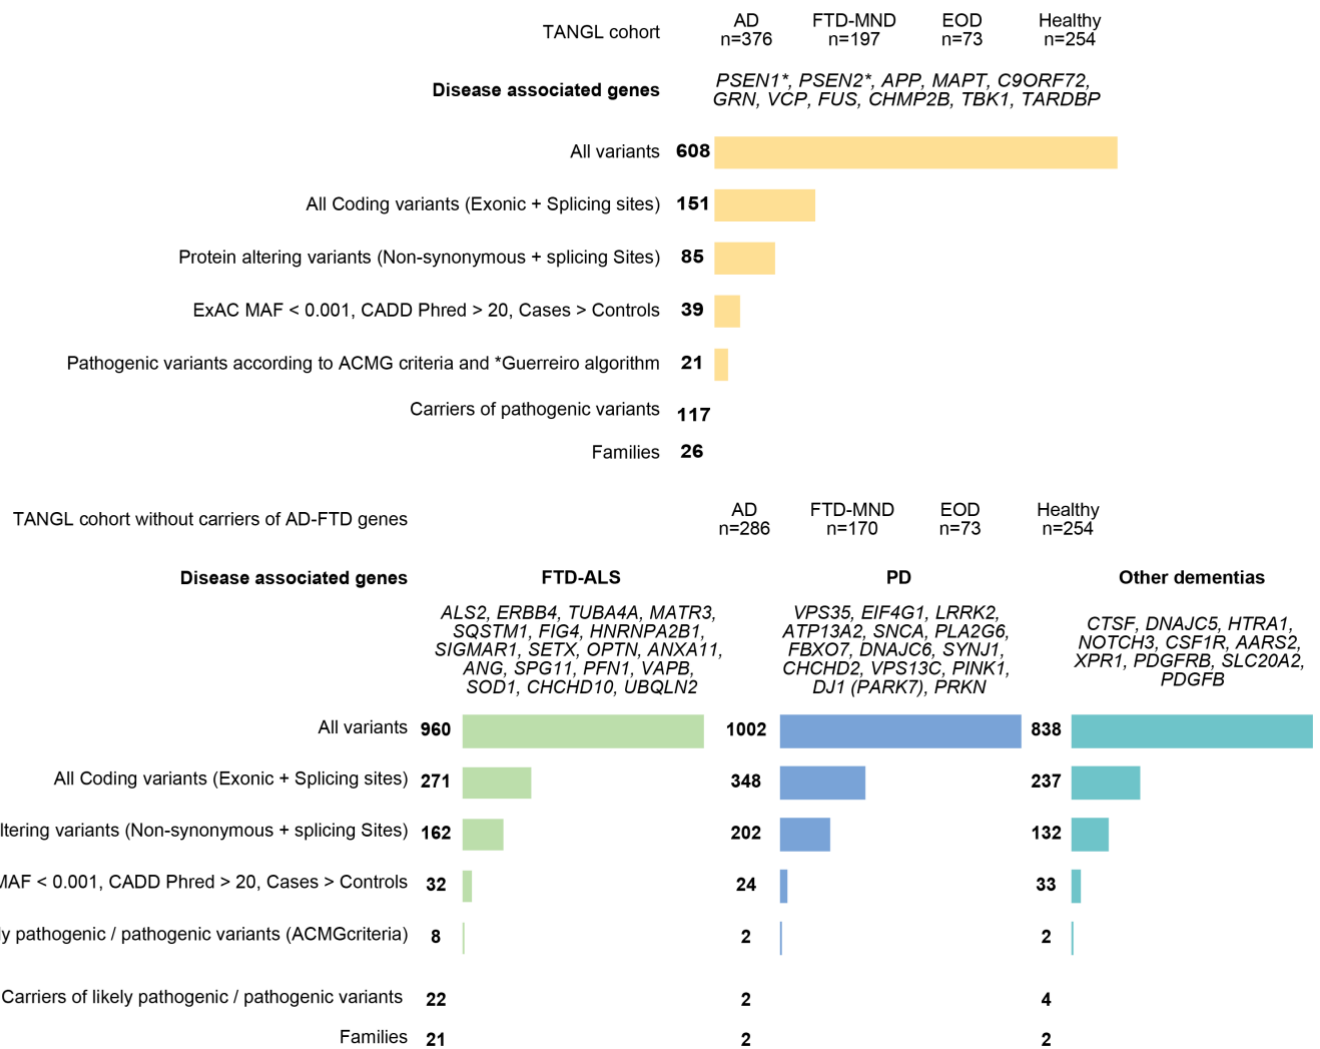

**Figure S15**

**Variant filtering of disease-causing variants in the TANGL cohort**

**Top row:** Genes associated with AD and FTD were selected from the AD/FTD mutation databases (<https://www.molgen.vib-ua.be/ADMutations> and <https://www.alzforum.org/mutations>). **Bottom row:** Variants in other genes associated with similar or overlapping phenotypes. Frontotemporal dementia and/or Amyotrophic Lateral Sclerosis (OMIM PS105550, PS167320, PS105400), Parkinson disease (OMIM PS168600), Adult-Onset Leukoencephalopathies (OMIM PS125310, 221820) and, Ceroid lipofuscinoses (OMIM PS256730).

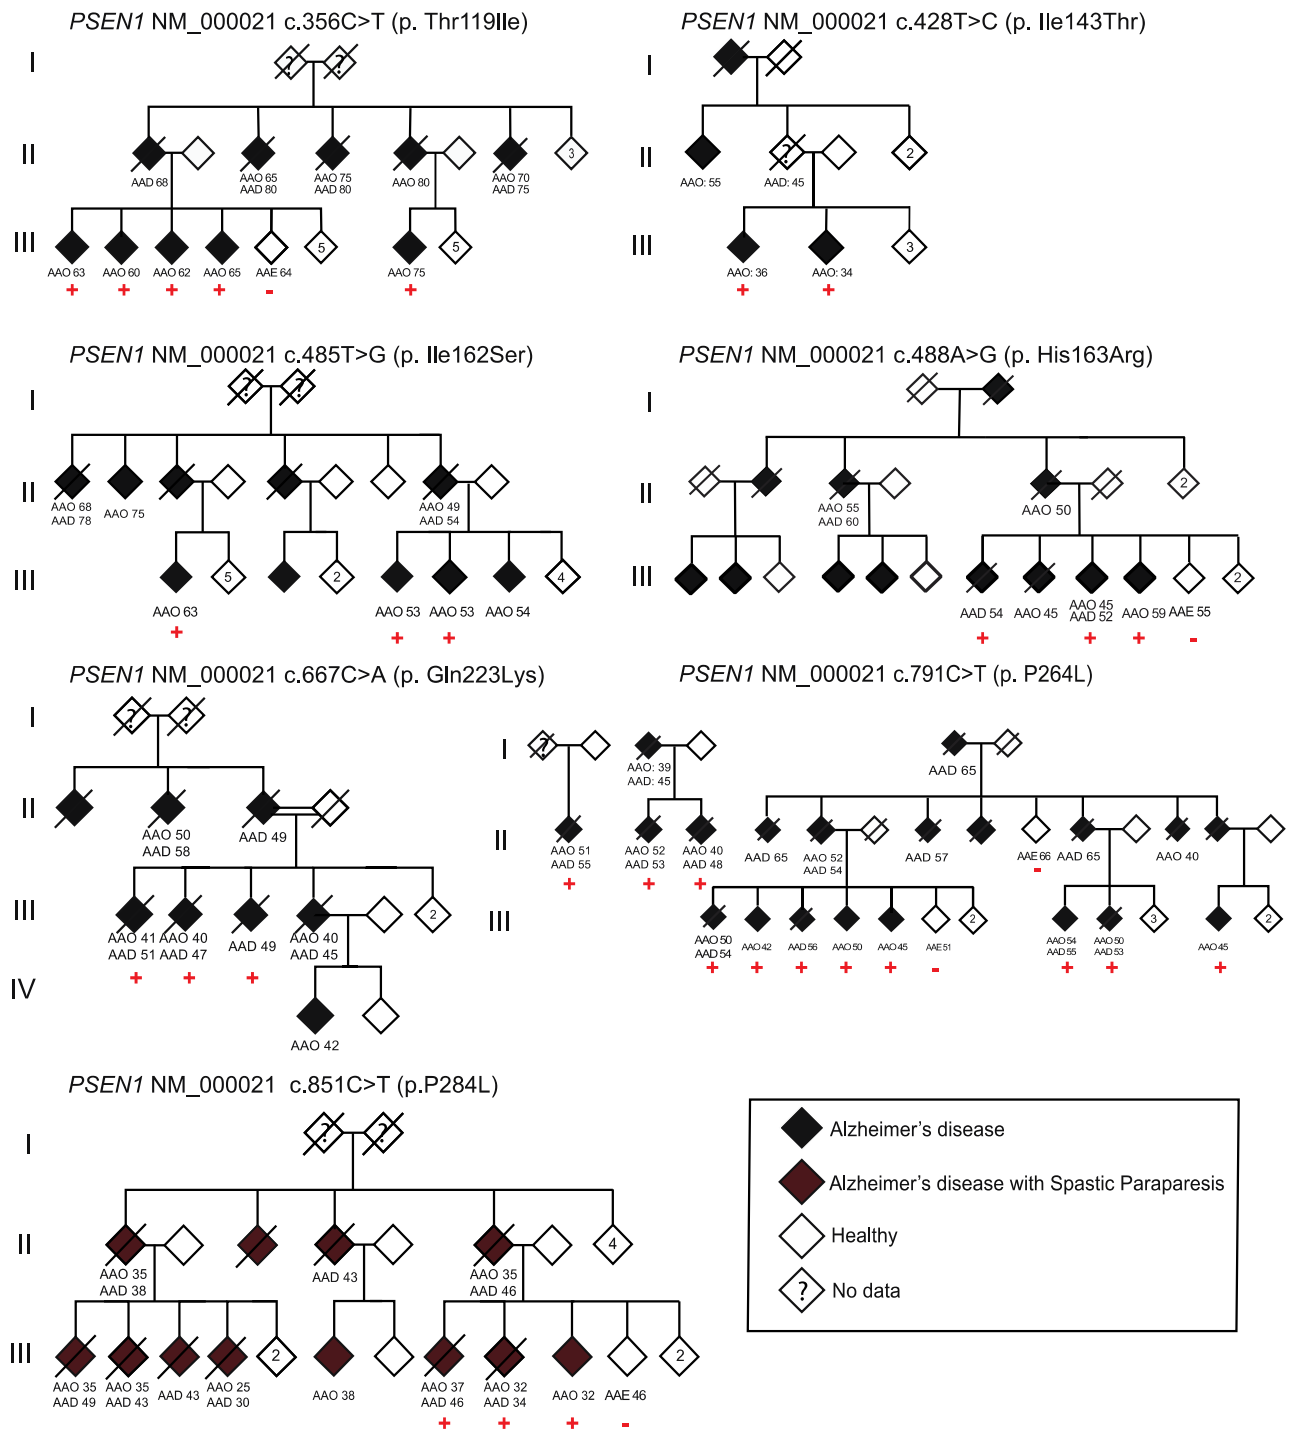

**Figure S16**

**Pedigrees of the families with pathogenic variants in *PSEN1* (NM\_000021).**

Affected individuals are represented as filled icons; empty icons represent asymptomatic individuals. Deceased individuals are crossed out. Numbers inside icons indicate number of siblings. The gender of the individuals was omitted for privacy. AAO: Age at onset, AAD: Age at death. + known carriers, - known non-carriers. Pedigrees of the Colombian families with *PSEN1* Pro117Ala, Glu280Ala and Ile 416Thr have been documented elsewhere.



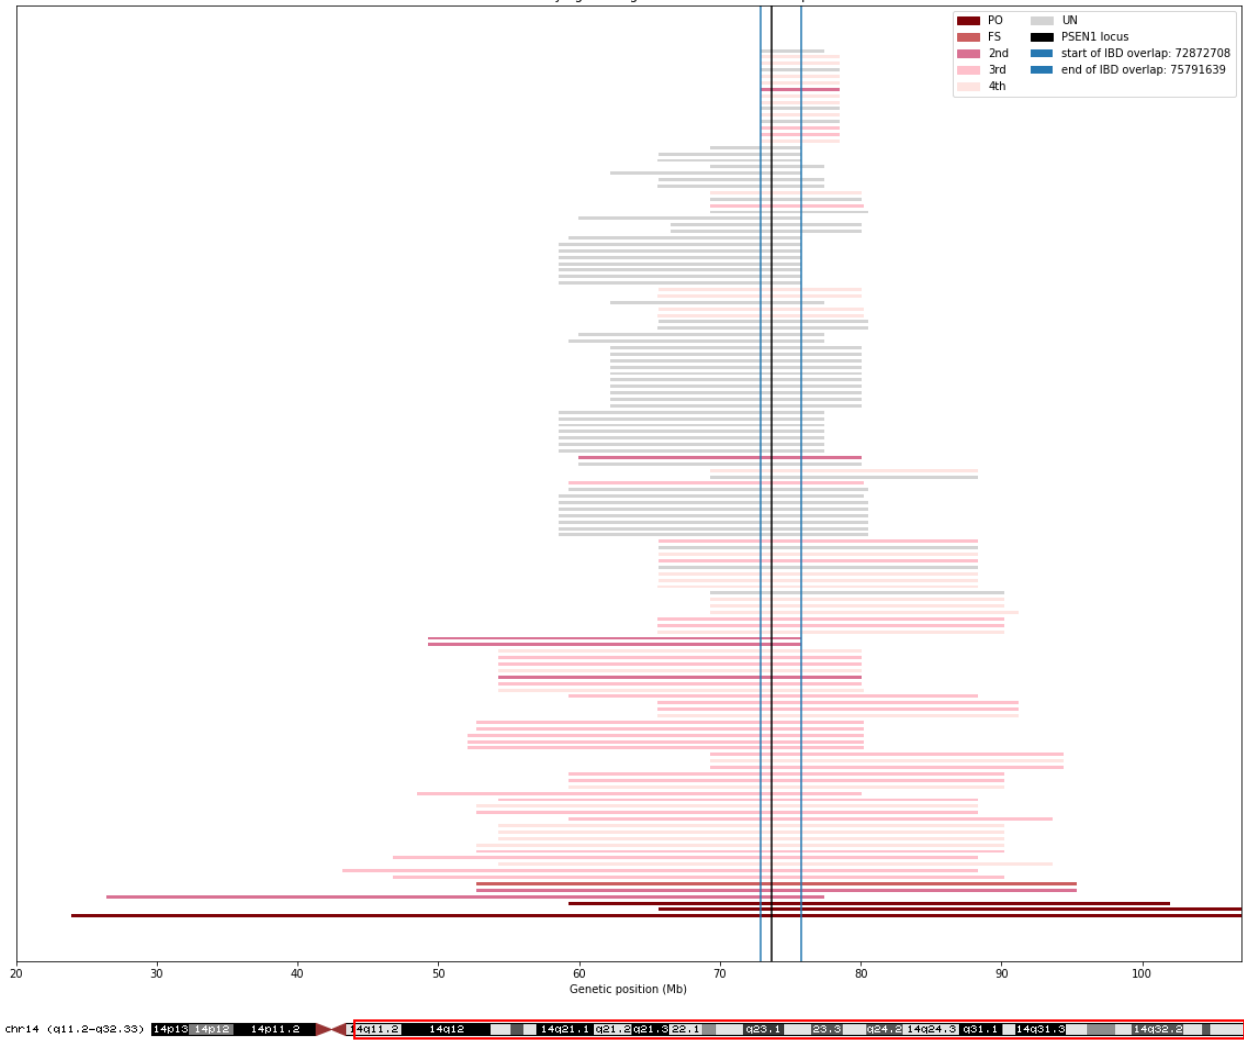

**Figure S17**

**Pairwise identity by Descent (IBD) segments in the chromosomes that harbor the *PSEN1* NM\_000021 c.791C>T (p. Pro264Leu) variant.**

Horizontal lines represent IBD haplotypes >2cM detected using Hap-IBD. The blue vertical lines indicate the portion of IBD segments shared among all the carriers, and the black vertical line indicates the locus of the *PSEN1* gene in chromosome 14. Each horizontal line represents a pairwise IBD segment between two carriers and is colored according to their relationship coefficient ( $r$ ) calculated by KING. PO: Parent-offspring ( $r=0.5$ ), FS: Full siblings ( $r=0.5$ ), 2<sup>nd</sup>: Second degree of relatedness ( $r=0.25$ ), 3<sup>rd</sup>: third degree of relatedness ( $r=0.125$ ), 4<sup>th</sup>: Fourth degree of relatedness ( $r=0.0625$ ). UN: Individuals beyond 4<sup>th</sup> degree of relatedness ( $r<0.0625$ )

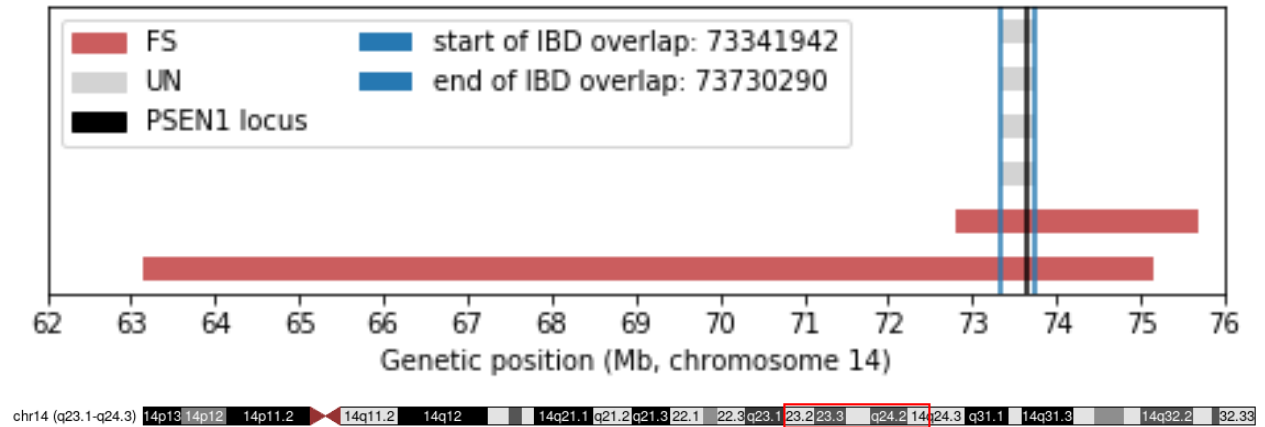

**Figure S18**

**Pairwise identity by Descent (IBD) segments in the chromosomes that harbor the *PSEN1* NM\_000021 c.428T>C (p.Ile143Thr) variant.**

Horizontal lines represent IBD haplotypes >2cM detected using Hap-IBD. The blue vertical lines indicate the portion of IBD segments shared among all the carriers, and the black vertical line indicates the locus of the *PSEN1* gene in chromosome 14. Each horizontal line represents a pairwise IBD segment between two carriers and is colored according to their relationship coefficient ( $r$ ) calculated by KING. FS: Full siblings( $r=0.5$ ), UN: Individuals beyond 4<sup>th</sup> degree of relatedness ( $r<0.0625$ )

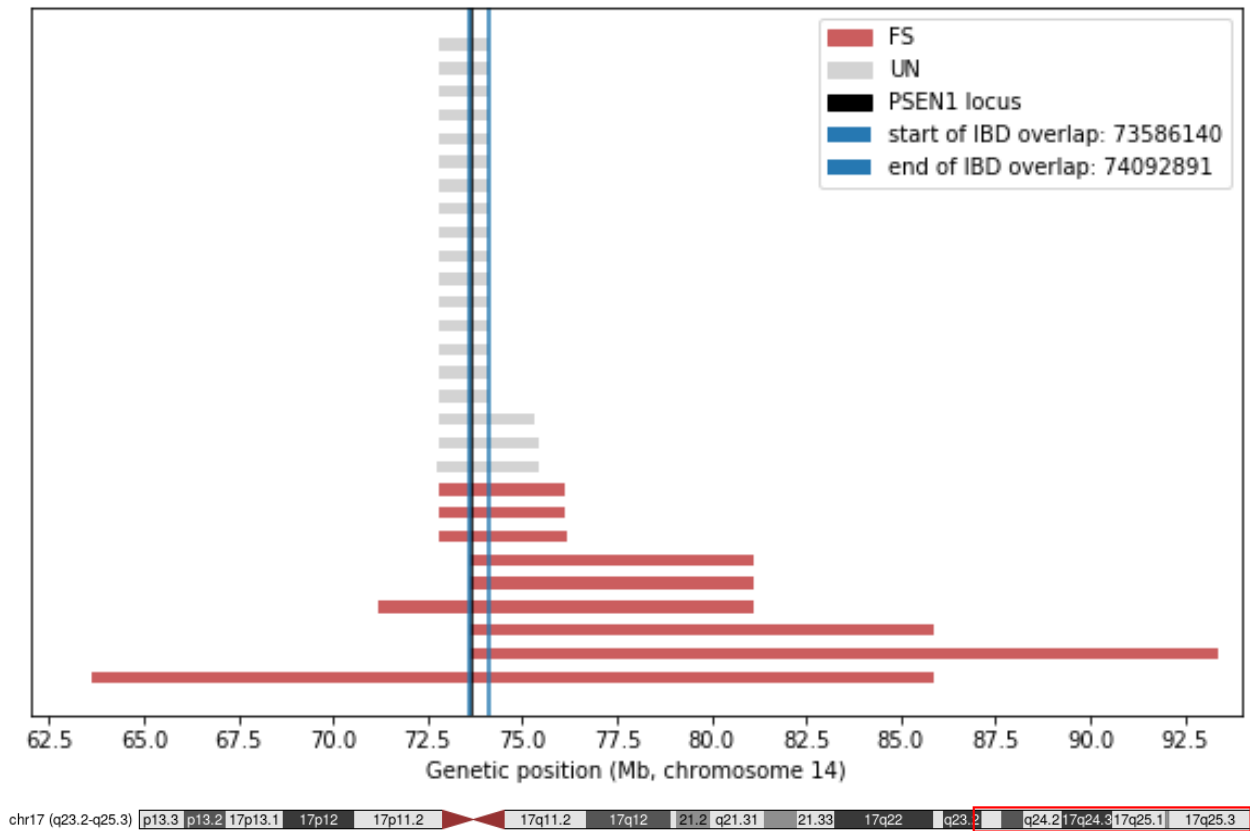

**Figure S19**

**Pairwise identity by Descent (IBD) segments in the chromosomes that harbor the *PSEN1* NM\_000021 c.356C>T (p.Thr191Ile) variant in Colombian individuals.**

Horizontal lines represent IBD haplotypes >2cM detected using Hap-IBD. The blue vertical lines indicate the portion of IBD segments shared among all the carriers, and the black vertical line indicates the locus of the *PSEN1* gene in chromosome 14. Each horizontal line represents a pairwise IBD segment between two carriers and is colored according to their relationship coefficient (r) calculated by KING. FS: Full siblings (r=0.5), UN: Individuals beyond 4<sup>th</sup> degree of relatedness (r<0.0625)

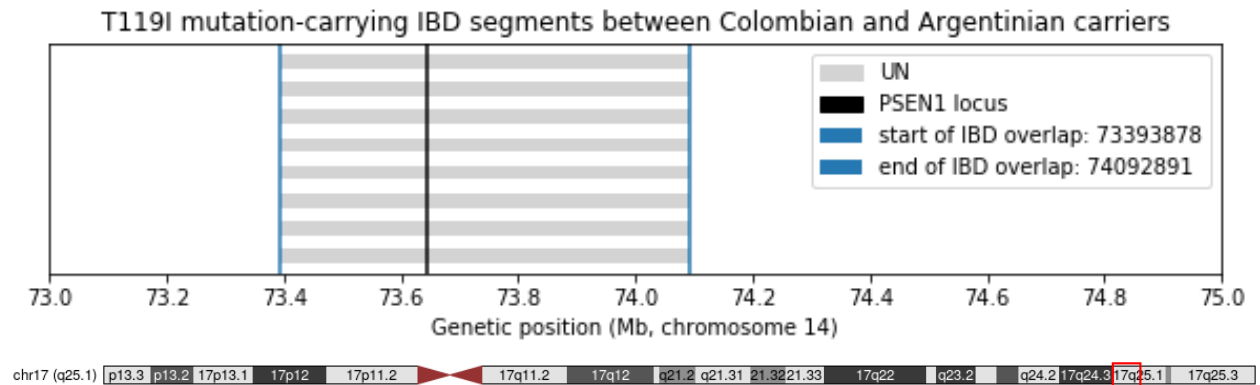

**Figure S20**

**Pairwise identity by Descent (IBD) segments carrying the *PSEN1* NM\_000021 c.356C>T (p.Thr119Ile) variant in Colombian and Argentinian individuals.**

Each Horizontal line represents a shared haplotype >2cM, IBD between the Argentinian sample and a Colombian carrier of the same variant. The IBD segments were detected using Hap-IBD. The blue vertical lines indicate the portion of IBD segments shared among all the carriers, and the black vertical line indicates the locus of the *PSEN1* gene in chromosome 14. Each horizontal line represents a pairwise IBD segment between two carriers and is colored according to their relationship coefficient ( $r$ ) calculated by KING. UN: Individuals beyond 4<sup>th</sup> degree of relatedness ( $r < 0.0625$ )

*PSEN2* NM\_000447 c.487C>T (p.Arg163Cys)

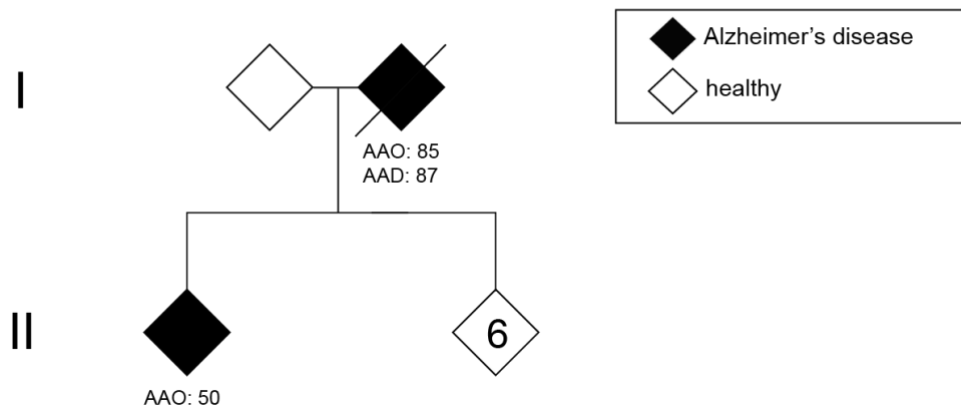

**Figure S21**

**Pedigrees of the family with a pathogenic variant in *PSEN2* (NM\_000447).**

Affected individuals are represented as filled icons; empty icons represent asymptomatic individuals. Deceased individuals are crossed out. Numbers inside icons indicate number of siblings. The gender of the individuals was omitted for privacy. AAO: Age at onset, AAD: Age at death. No cosegregation data available for this family

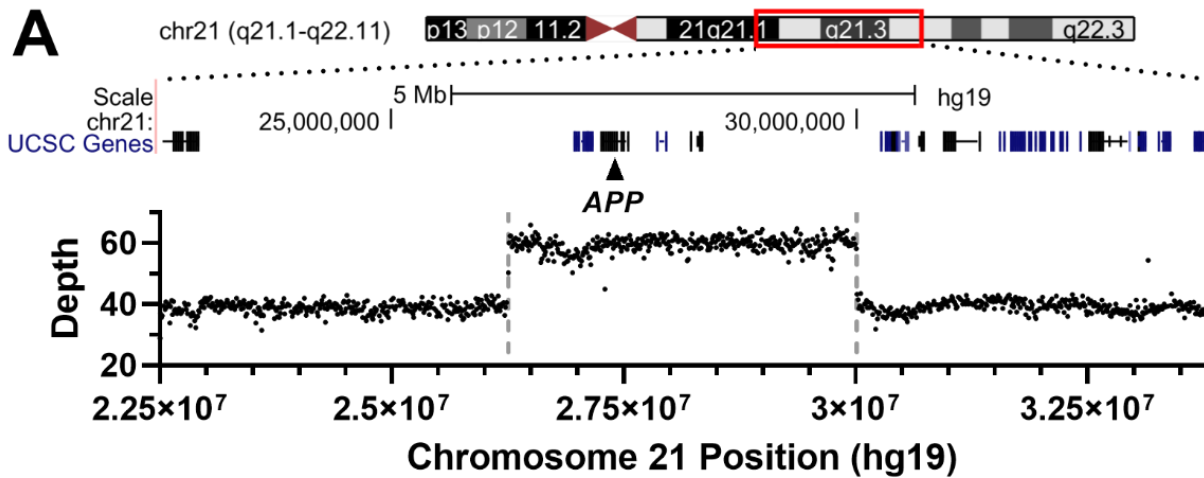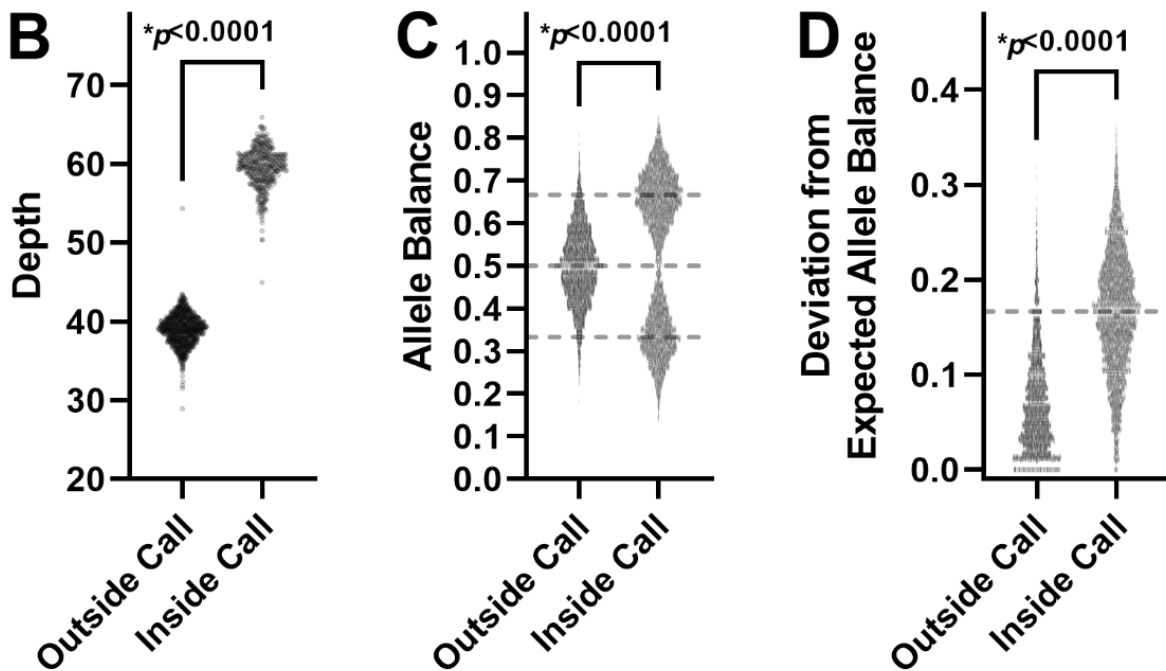

**Figure S22**

**Depth and allele balance indicate a duplication including *APP*.**

(A) Sequencing read depth demonstrating a 3.76 MB duplication that includes the full *APP* gene (hg19 position). This copy number variant was called by four independent callers (DELLY, ERDS, CNVnator, and BIC-seq2). (B) Sequencing depth is significantly higher within the called region ( $p < 0.0001$ , Mann-Whitney). (C) The distribution of allele balance is significantly different within the called region ( $p < 0.0001$ , Kolmogorov-Smirnov). (D) Displayed another way, as deviation of the expected allele balance of 0.5, the distribution of allele balance is significantly different within the called region ( $p < 0.0001$ , Mann-Whitney).

*MAPT* NM\_005910 c.902C>T (p.Pro301Leu)

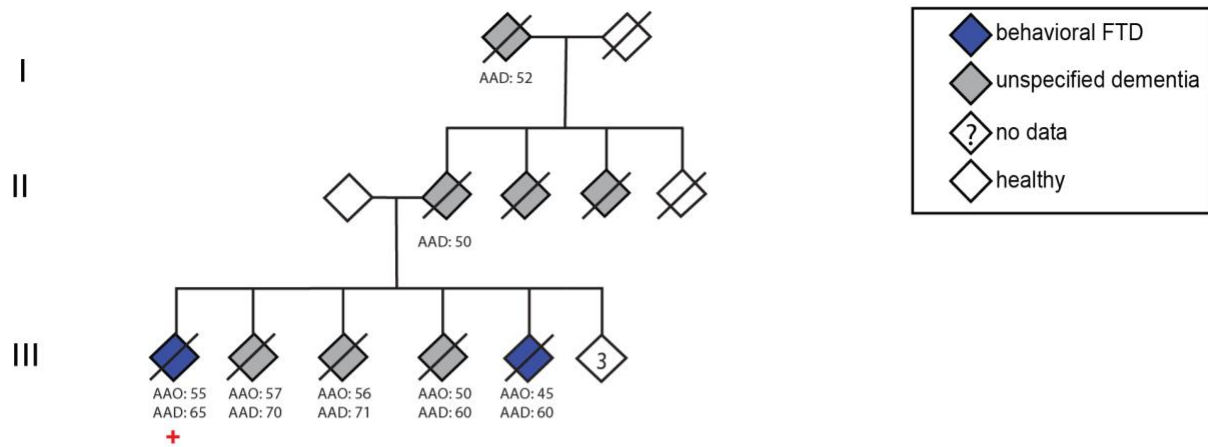

*MAPT* NM\_005910 c.1189C>T (p.Pro397Ser)

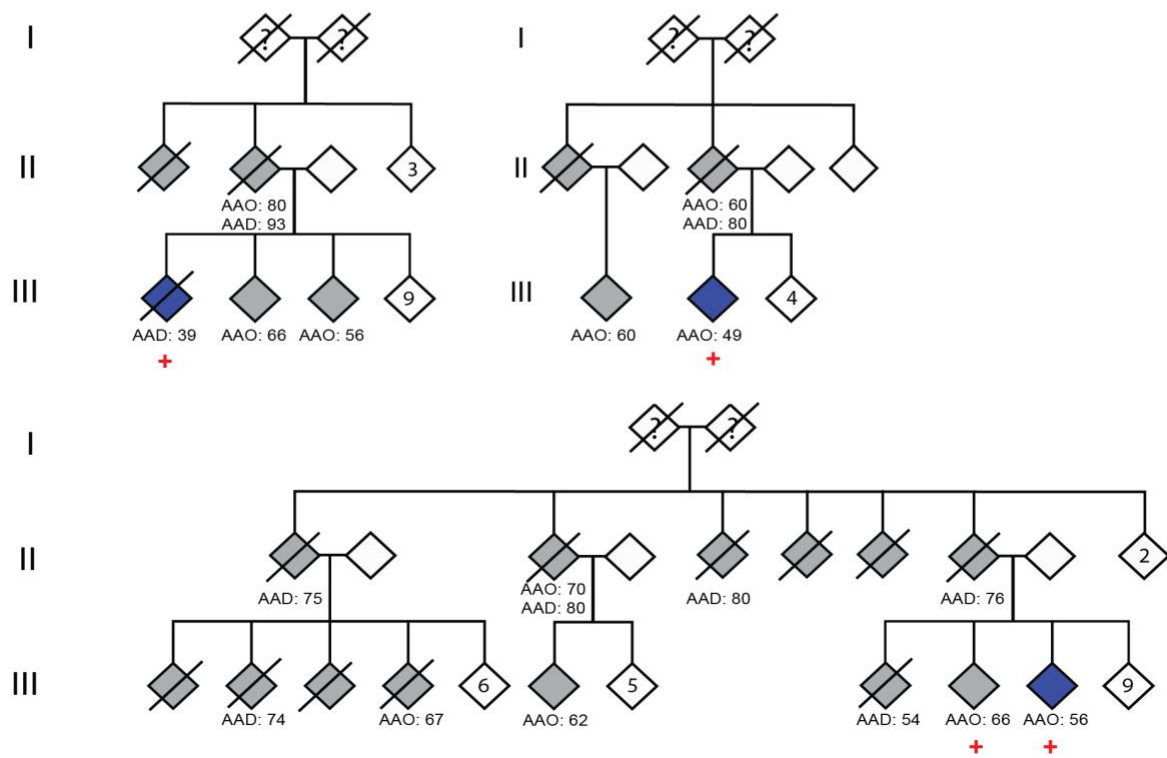

**Figure S23**

**Pedigrees of the families with pathogenic variants in *MAPT* (NM\_005910).**

Affected individuals are represented as filled icons; empty icons represent asymptomatic individuals, numbers inside icons represent number of healthy siblings. Deceased individuals are crossed out. + known carriers, - known non-carriers. The gender of the individuals was omitted for privacy AAO: Age at onset, AAD: Age at death, FTD: Frontotemporal Dementia.

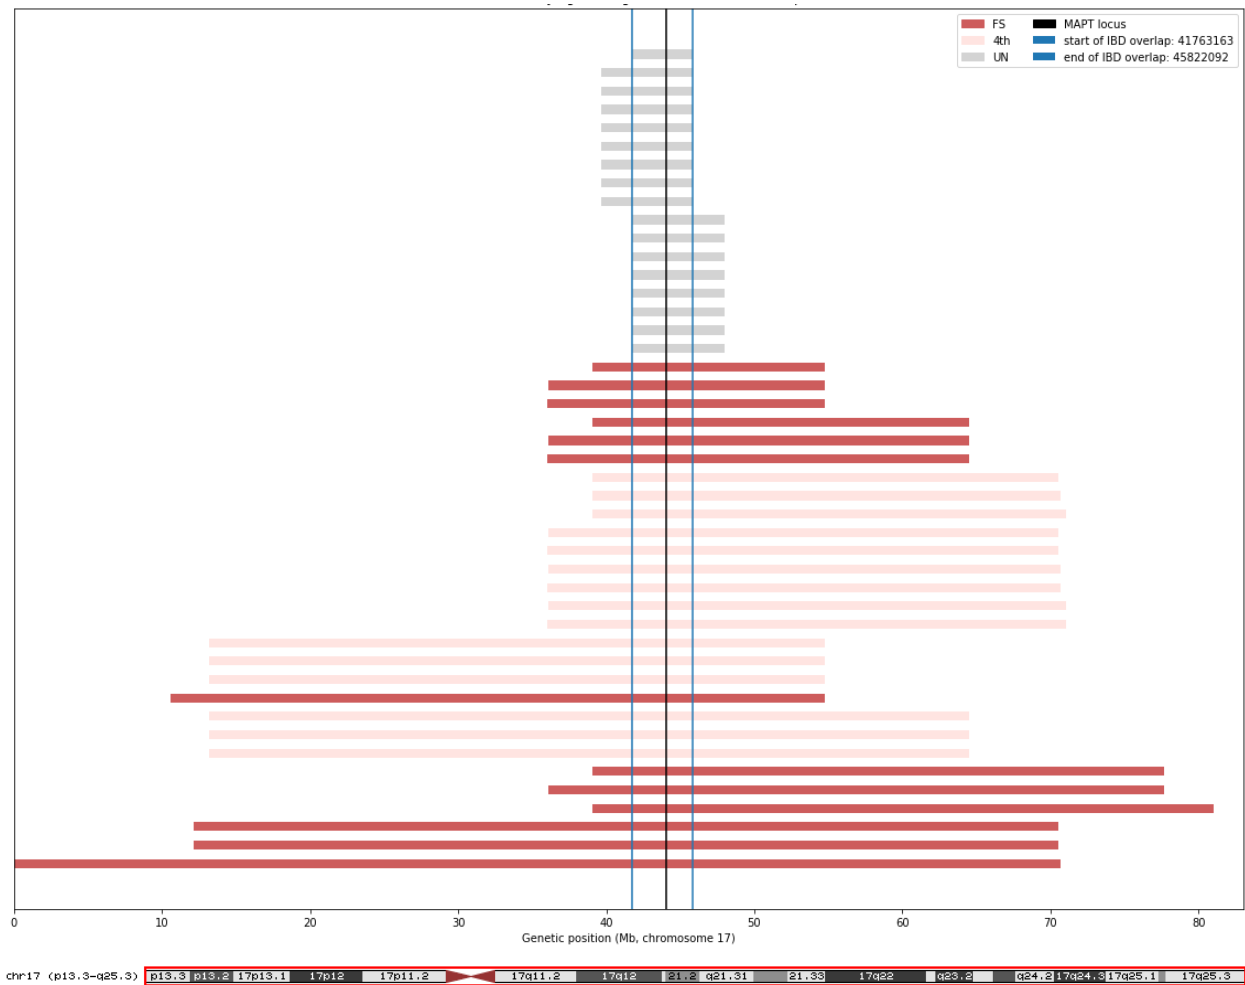

**Figure S24**

**Pairwise identity by Descent (IBD) segments in the chromosomes that harbor the *MAPT* NM\_005910 c.1189C>T (p.Pro397Ser) variant.**

Horizontal lines represent IBD haplotypes >2cM detected using Hap-IBD. The blue vertical lines indicate the portion of IBD segments shared among all the carriers, and the black vertical line indicates the locus of the *MAPT* gene in chromosome 17. Each horizontal line represents a pairwise IBD segment between two carriers and is colored according to their relationship coefficient ( $r$ ) calculated by KING. FS: Full siblings ( $r=0.5$ ), 3<sup>rd</sup>: third degree of relatedness ( $r=0.125$ ). UN: Individuals beyond 4<sup>th</sup> degree of relatedness ( $r<0.0625$ )



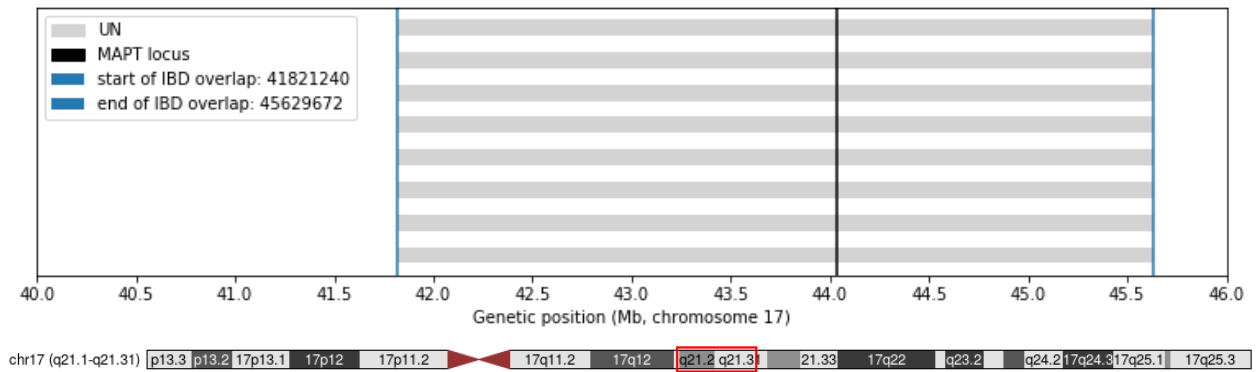

### Figure S25

#### Pairwise identity by Descent (IBD) segments in the chromosomes that harbor the MAPT NM\_005910 c.1189C>T (p.Pro397Ser) variant from Colombian and Spanish families.

Horizontal lines represent IBD haplotypes >2cM detected using Hap-IBD. The blue vertical lines indicate the portion of IBD segments shared among all the carriers, and the black vertical line indicates the locus of the *MAPT* gene in chromosome 17. Each horizontal line represents a pairwise IBD segment between two carriers and is colored according to their relationship coefficient ( $r$ ) calculated by KING. FS: Full siblings ( $r=0.5$ ), 3<sup>rd</sup>: third degree of relatedness ( $r=0.125$ ). UN: Individuals beyond 4<sup>th</sup> degree of relatedness ( $r<0.0625$ )

TBK1 c.1257\_1258del (p.Val421fs)

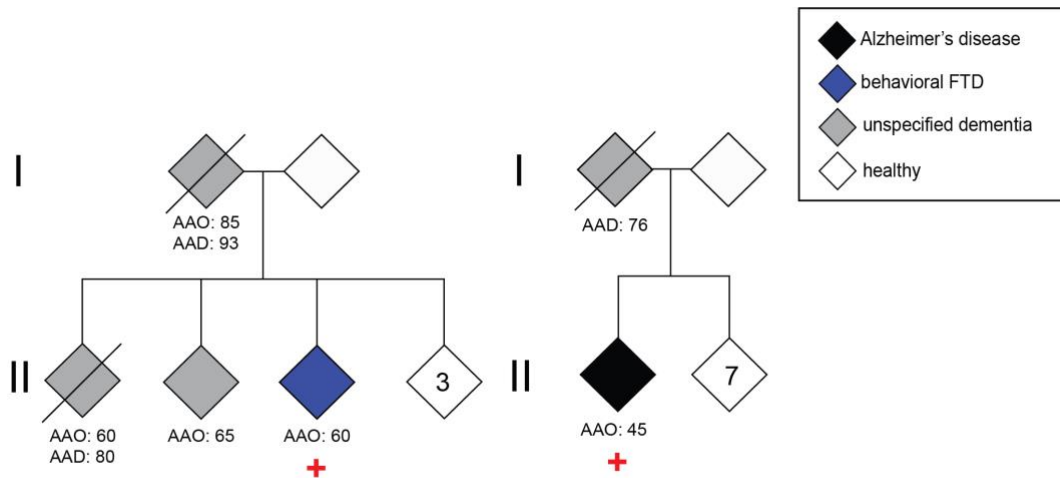

8

TBK1c.1717C>T (p.Arg573Cys)

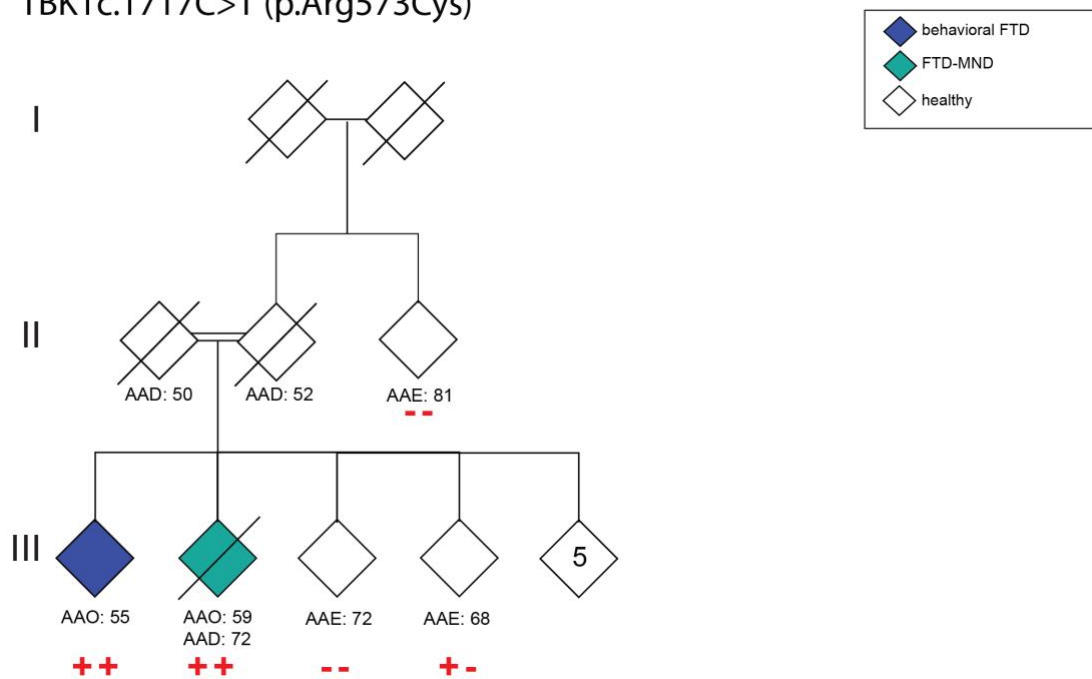

**Figure S26**

**Pedigrees of the families with pathogenic variants in *TBK1* (NM\_013254).**

Affected individuals are represented as filled icons; empty icons represent asymptomatic individuals, numbers inside icons represent number of healthy siblings. Deceased individuals are crossed out. The gender of the individuals was omitted for privacy. AAO: Age at onset, AAD: Age at death, AAE: age at evaluation FTD: Frontotemporal Dementia, FTD-MND: Frontotemporal dementia with motor neuron disease. For c.1257\_1258del (p.Val421Cfs\*26) + represents known heterozygous carriers. For c.1717C>T (p.Arg573Cys) ++ represents homozygous alternate, +- heterozygous and - - homozygous reference individuals.

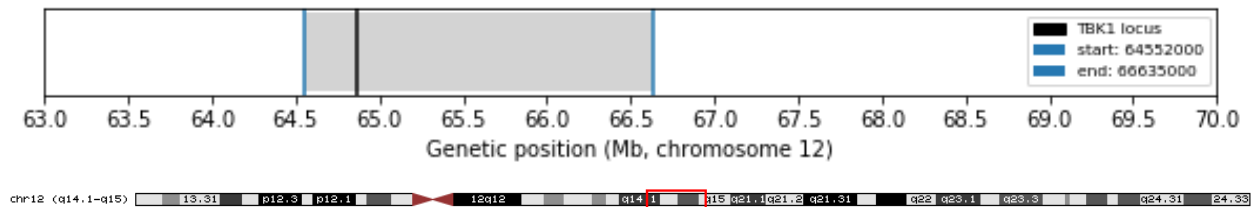

**Figure S27**

**Pairwise identity by Descent (IBD) segments in the chromosomes that harbor *TBK1* NM\_013254 c.1257\_1258del (p.Val421Cfs) variant.**

The horizontal gray line represents the pairwise IBD segment >2cM detected using Hap-IBD. The blue vertical lines indicate the portion of IBD segment shared among both carriers, and the black vertical line indicates the locus of the *TBK1* gene in chromosome 12.

*TARDBP* NM\_007375 c.1147A>G (p.Ile383Val)

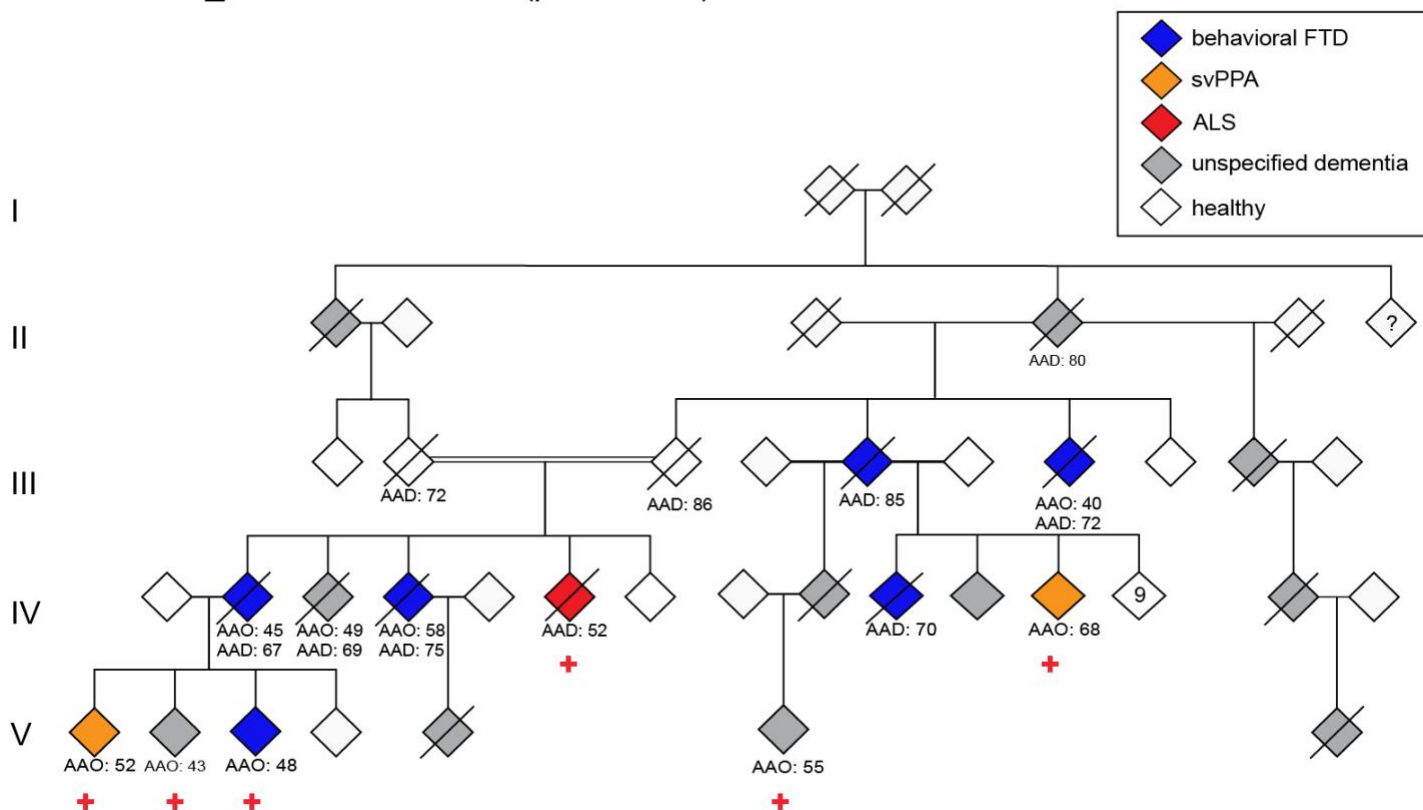

**Figure S28**

**Pedigree of the family with a pathogenic variant in *TARDBP* (NM\_007375).**

Affected individuals are represented as filled icons; empty icons represent asymptomatic individuals, numbers inside icons represent number of healthy siblings. Deceased individuals are crossed out. The gender of the individuals was omitted for privacy. AAO: Age at onset, AAD: Age at death, FTD: Frontotemporal Dementia, svPPA: Semantic variant of primary progressive aphasia, ALS: Amyotrophic lateral sclerosis. + known carriers, - known non-carriers.

*GRN* NM\_002087 c.709-2A>G (p.Ala237fs)

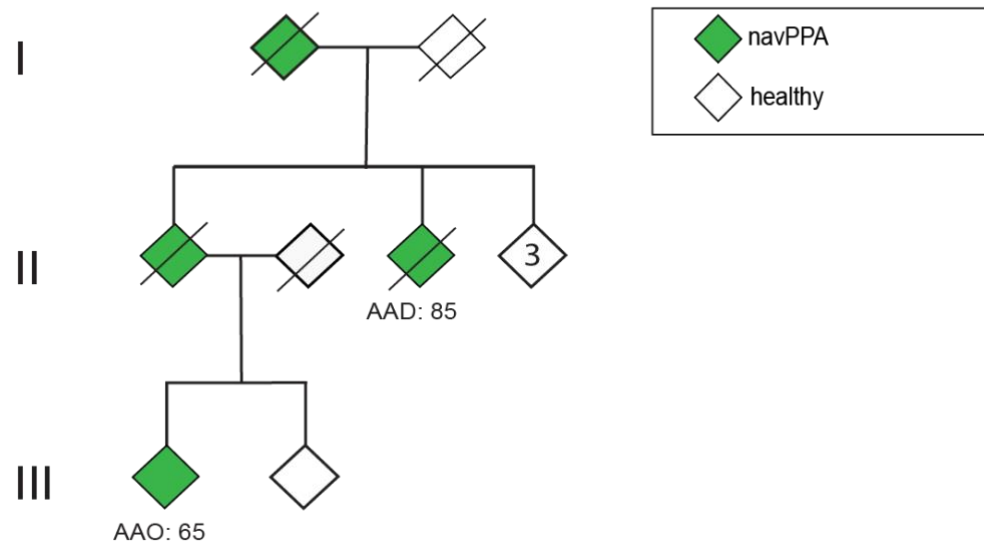

**Figure S29**

**Pedigree of the family with a pathogenic variant in *GRN* (NM\_002087).**

Affected individuals are represented as filled icons; empty icons represent asymptomatic individuals, numbers inside icons represent number of healthy siblings. Deceased individuals are crossed out. The gender of the individuals was omitted for privacy. AAO: Age at onset, AAD: Age at death, navPPA: primary progressive aphasia-non-fluent/agrammatic variant. No cosegregation data available for this family

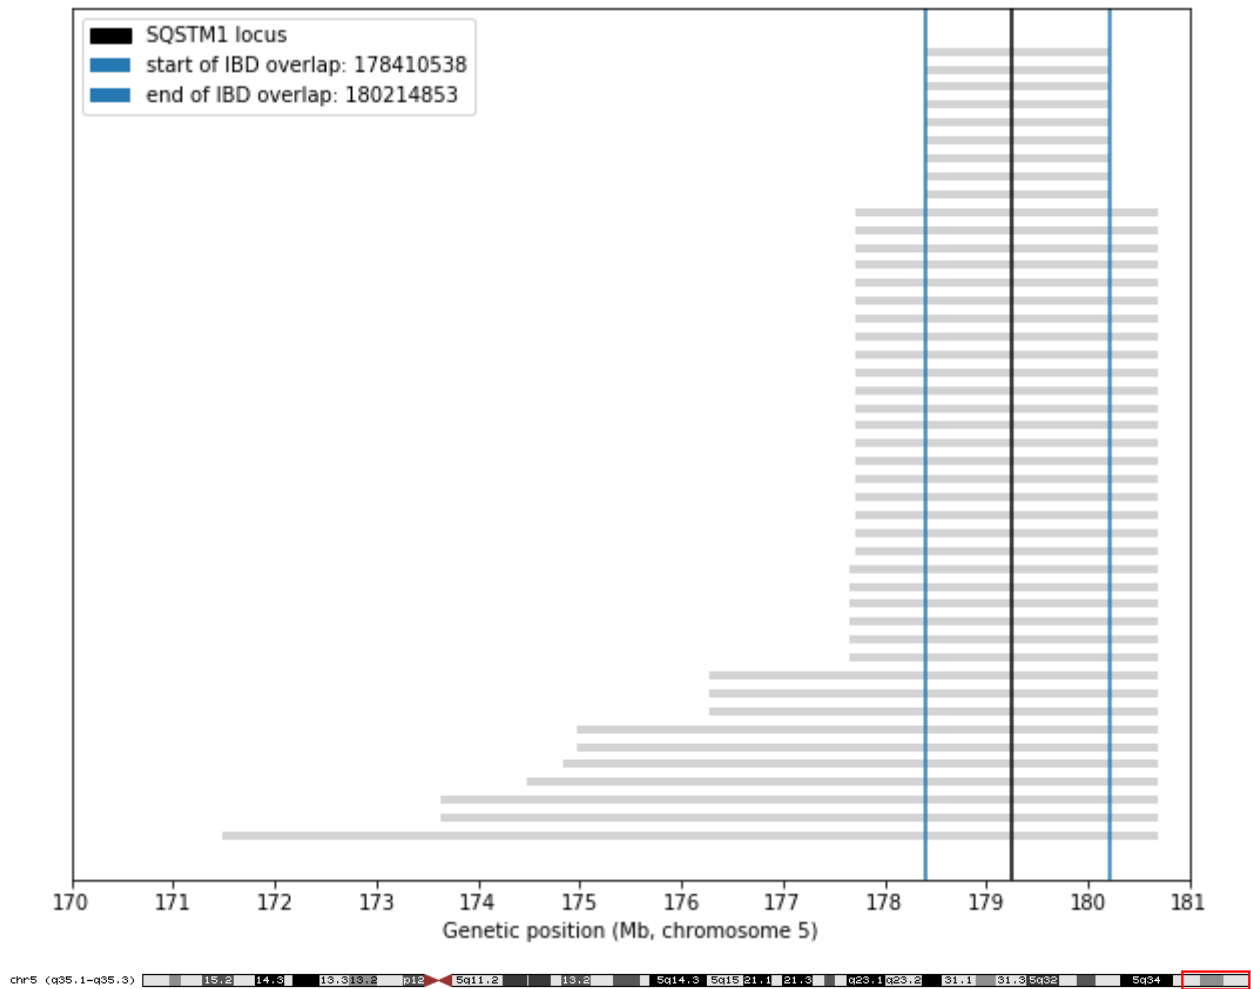

### Figure S30

#### Pairwise identity by Descent (IBD) segments in the chromosomes that harbor *SQSTM1* NM\_003900 c.1175C>T (p.Pro392Leu) variant in the TANGL cohort.

Horizontal lines represent IBD haplotypes >2cM detected using Hap-IBD. The blue vertical lines indicate the portion of IBD segments shared among all the carriers, and the black vertical line indicates the locus of the *SQSTM1* gene in chromosome 5. Each horizontal line represents a pairwise IBD segment between two carriers and is colored according to their relationship coefficient ( $r$ ) calculated by KING. Gray lines represent unrelated individuals (UN) or beyond 4<sup>th</sup> degree of relatedness ( $r < 0.0625$ ). There was no IBD segment >2cM between the TANGL and the 1000GP *SQSTM1* Pro392Leu carriers.

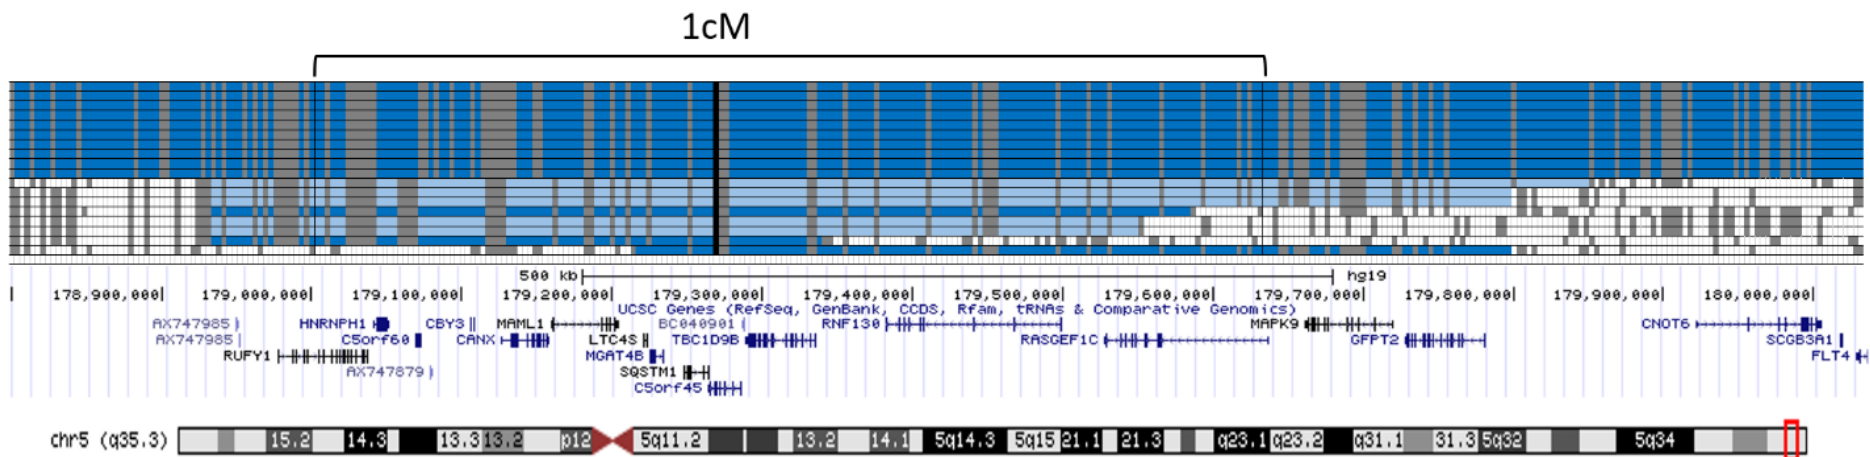

**Figure S31**

**Alignment of the haplotypes that harbor *SQSTM1* NM\_003900 c.1175C>T (p.Pro392Leu) variant in the TANGL and the 1000GP cohort.**

Alignment of thirteen variant carrying haplotypes from the TANGL cohort (dark blue) and 1000GP (light blue). Black vertical line represents the location of the variant of interest. cM: centimorgans

*TUBA4A* NM\_006000 c.820C>G (p.Pro274Ala)

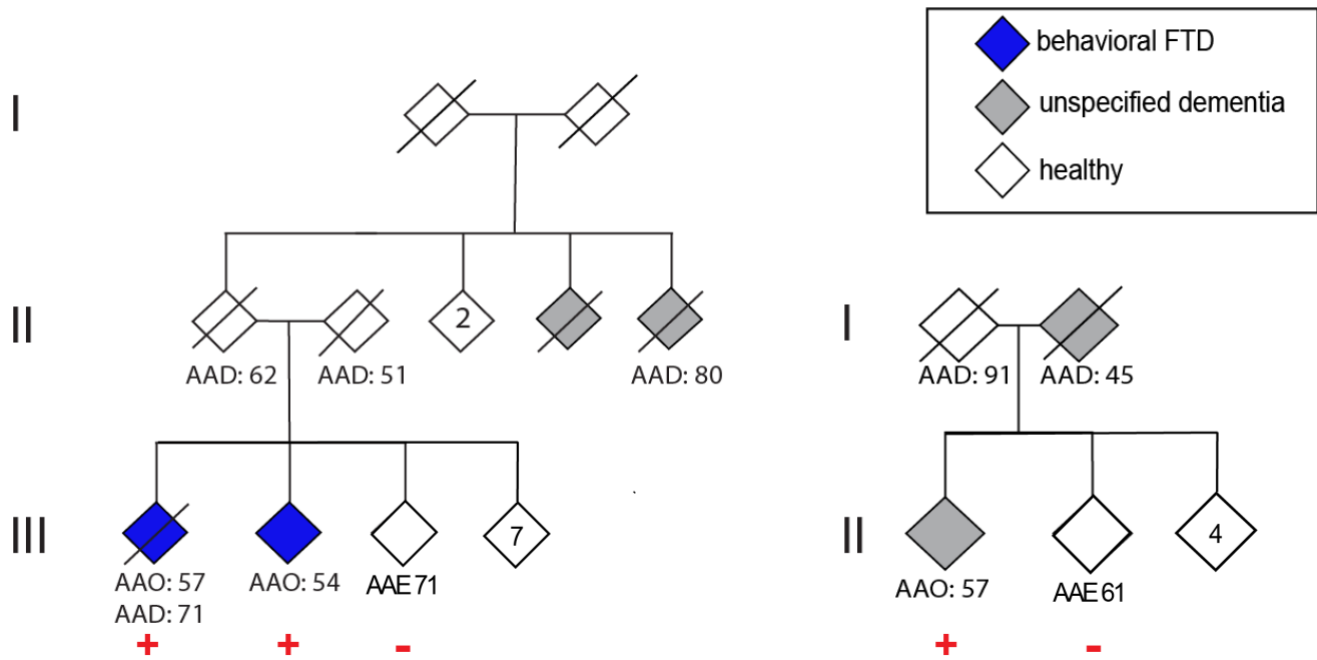

**Figure S32**

**Pedigrees of the families with pathogenic variants in *TUBA4A* (NM\_006000).**

Affected individuals are represented as filled icons; empty icons represent asymptomatic individuals, numbers inside icons represent number of healthy siblings. Deceased individuals are crossed out. The gender of the individuals was omitted for privacy. AAO: Age at onset, AAD: Age at death, AAE: Age at evaluation FTD: frontotemporal dementia. + known carriers, - known non-carriers.



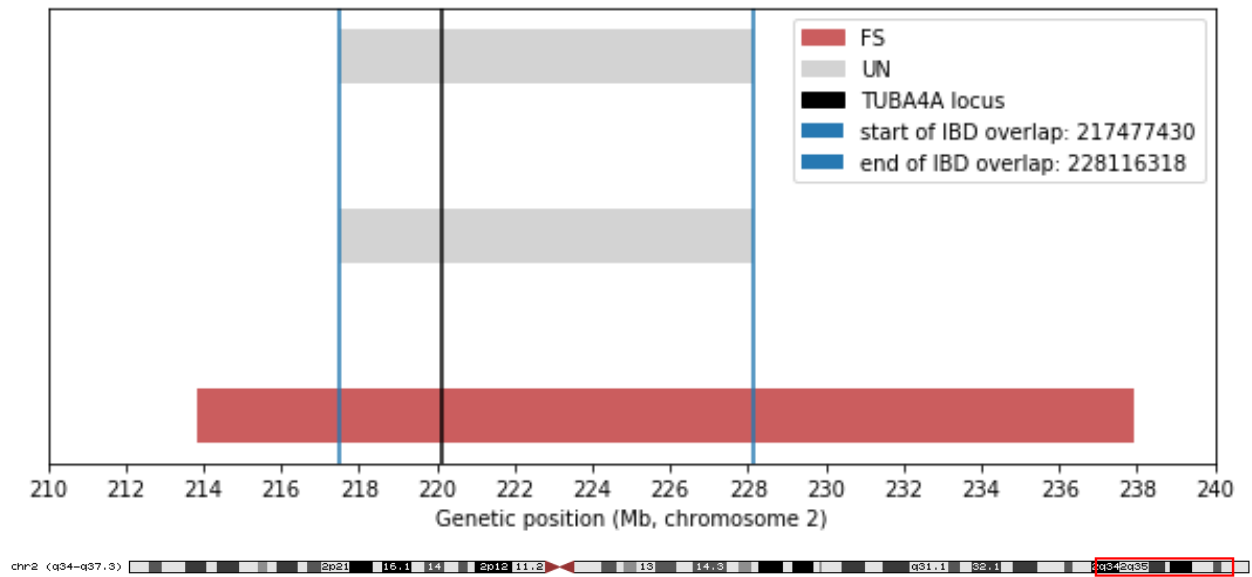

**Figure S33**

**Pairwise identity by Descent (IBD) segments in the chromosomes that harbor *TUBA4A* NM\_006000 c.820C>G (p.Pro274Ala) variant.**

Horizontal lines represent IBD haplotypes >2cM detected using Hap-IBD. The blue vertical lines indicate the portion of IBD segments shared among all the carriers, and the black vertical line indicates the locus of the *TUBA4A* gene in chromosome 2. Each horizontal line represents a pairwise IBD segment between two carriers and is colored according to their relationship coefficient ( $r$ ) calculated by KING. FS: Full siblings( $r=0.5$ ), UN: Individuals beyond 4<sup>th</sup> degree of relatedness ( $r<0.0625$ )

## *UBQLN2* NM\_0013444 c.724G>A (p.Ala242Thr)

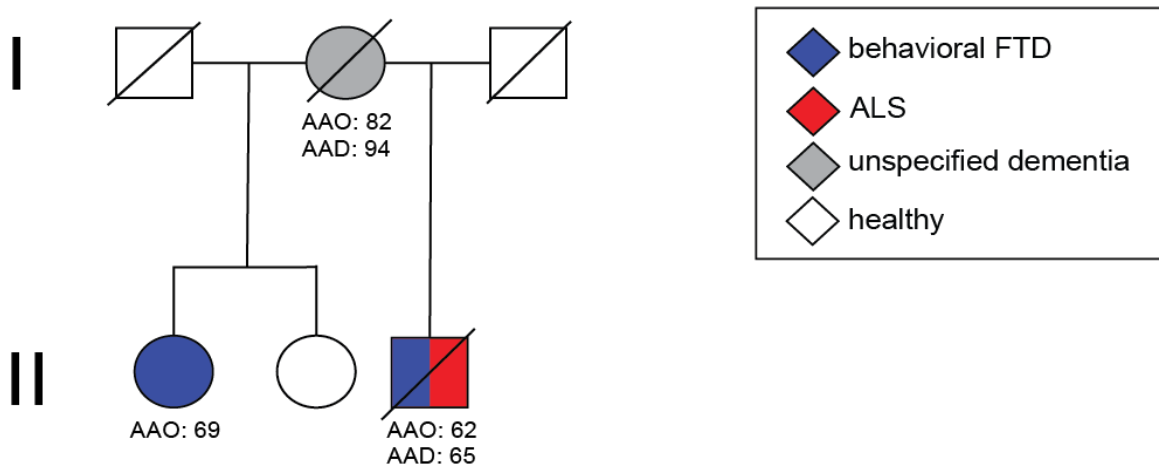

**Figure S34**

**Pedigrees of the families with pathogenic variants in *UBQLN2* (NM\_0013444) identified by the present study.**

Affected individuals are represented as filled icons; empty icons represent asymptomatic individuals, numbers inside icons represent number of healthy siblings. Deceased individuals are crossed out. Females are represented by circles, and males by squares. AAO: Age at onset, AAD: Age at death, FTD: frontotemporal dementia. ALS: Amyotrophic lateral sclerosis. No cosegregation data available for this family

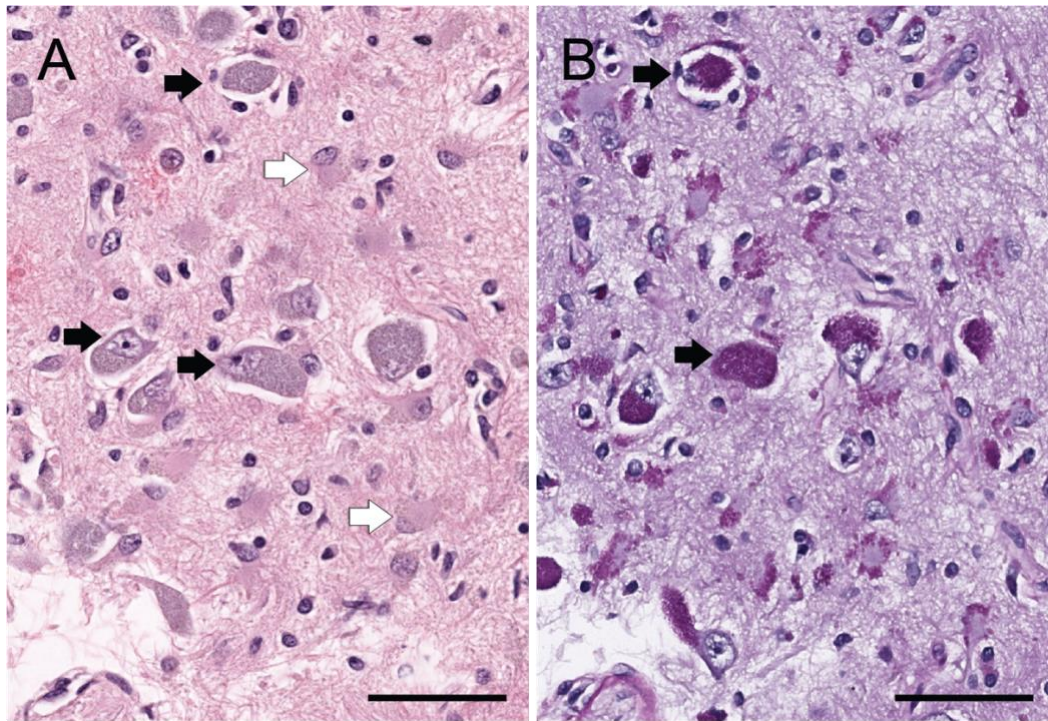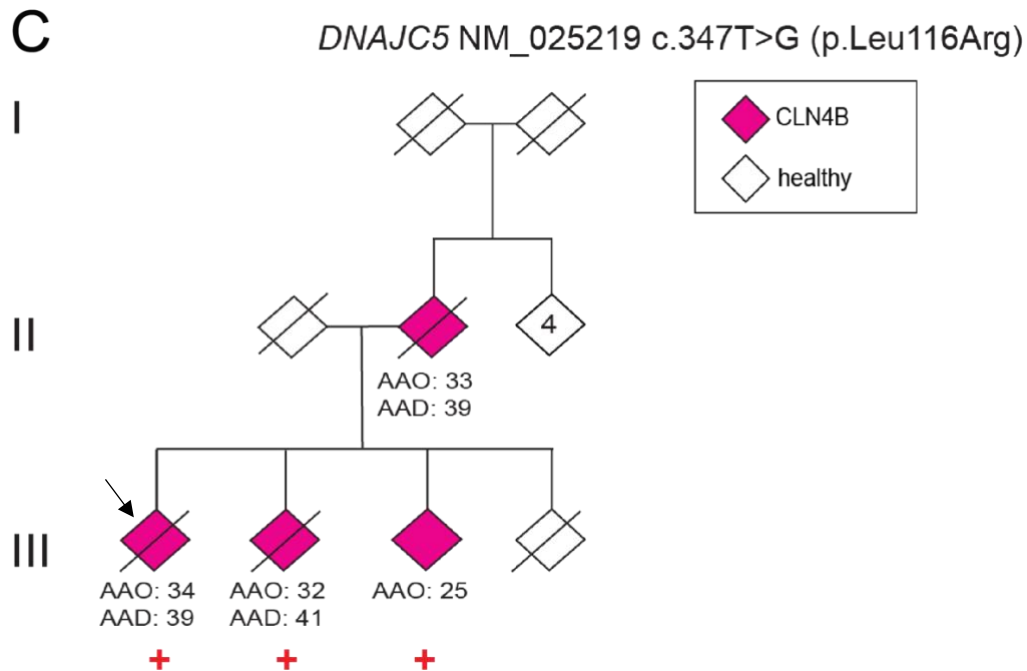

**Figure S35**

**Top row: Histological characterization of ceroid neuronal lipofuscinosis-4B (CNL4B).**

Staining with hematoxylin eosin – HE (A) and periodic acid Schiff - PAS(B). A. Foamy neuronal cytoplasmic inclusions that displace cell nucleus (black arrows), and reactive astrocytes (white arrows) in hippocampus CA1. [Scale bar 50µm] B. PAS positive neuronal cytoplasmic inclusions (black arrows) [Scale bar 50µm]

**Bottom row (C): Pedigree of the family**

Affected individuals are represented as filled icons; empty icons represent asymptomatic individuals, numbers inside icons represent number of healthy siblings. Deceased individuals are crossed out. The gender of the individuals was omitted for confidentiality. AAO: Age at onset, AAD: Age at death. Proband is indicated with an arrow. + known carriers.

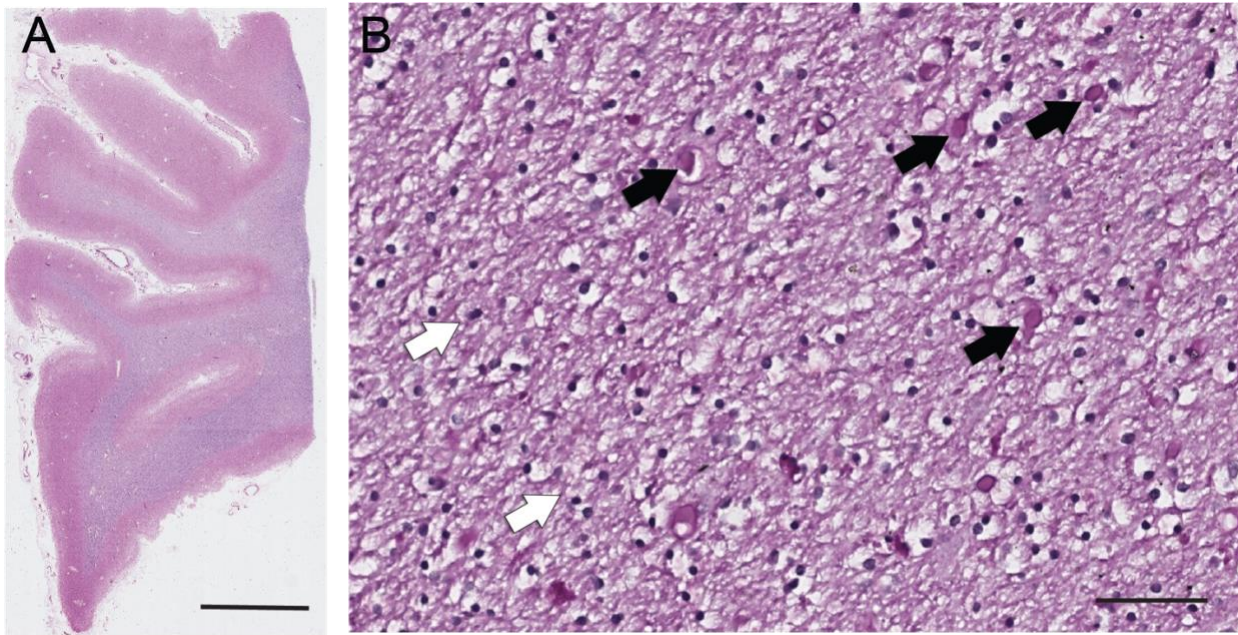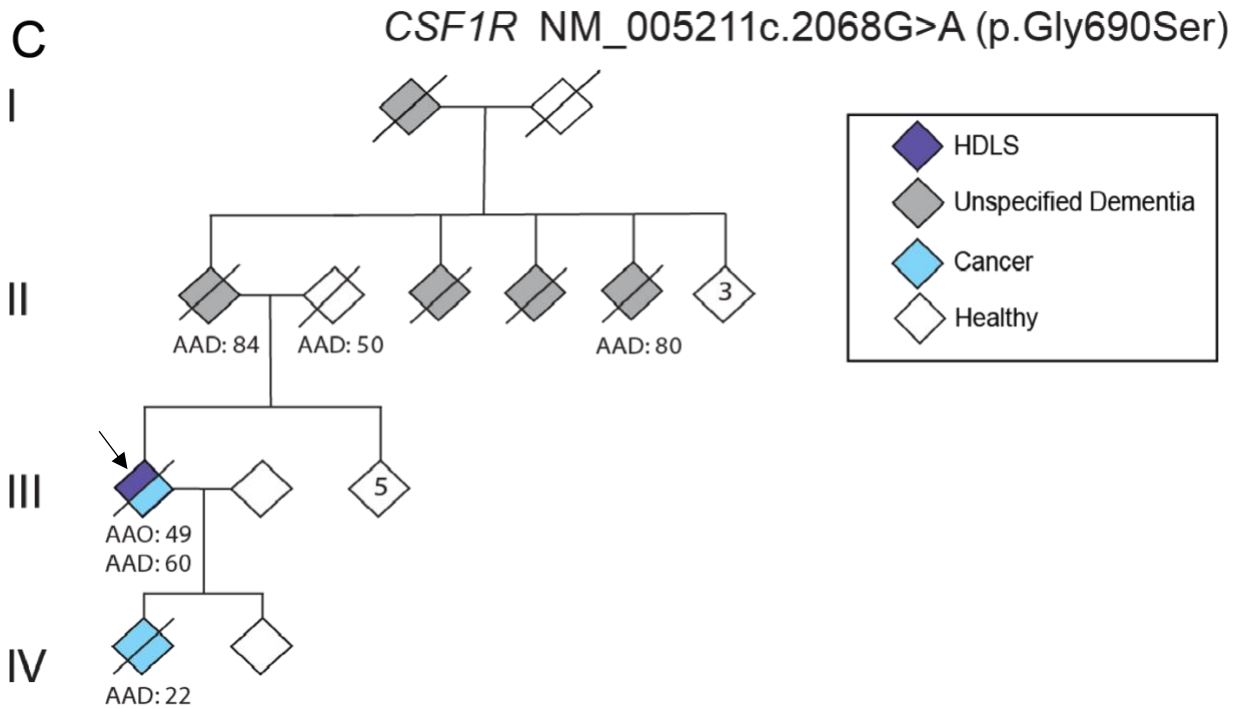

**Figure S36**

**Top row: Histological characterization of hereditary diffuse leukoencephalopathy with spheroids (HDLS).** Staining with Luxol fast blue (A) and periodic acid Schiff - PAS(B). A. Rarefied white matter and myelin loss in the inferior parietal lobe. [Scale bar 5mm] B. PAS positive axonal spheroids (black arrows) and foamy macrophages (white arrows). [Scale bar 50um]

**Bottom row (C): Pedigree of the family**

Affected individuals are represented as filled icons; empty icons represent asymptomatic individuals, numbers inside icons represent number of healthy siblings. Deceased individuals are crossed out. The gender of the individuals was omitted for confidentiality. AAO: Age at onset, AAD: Age at death. Proband is indicated with an arrow.

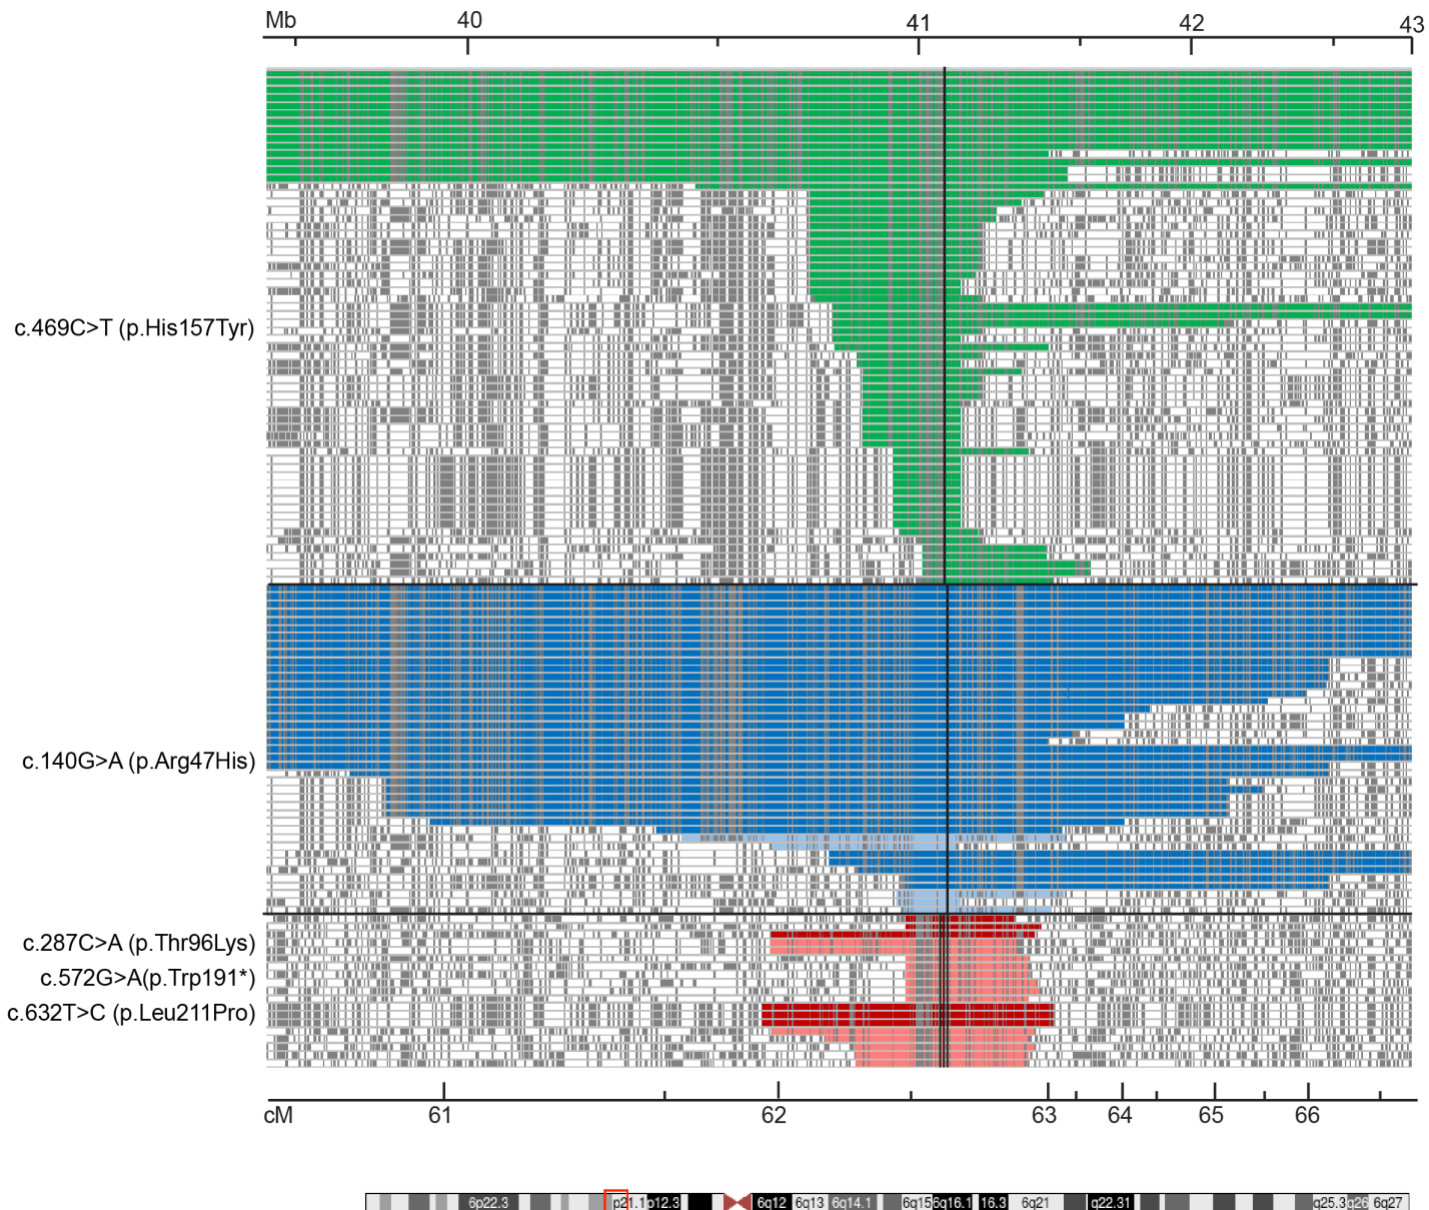

**Figure S37**

**Alignment of the haplotypes that carry Strictly Damaging and Protein Truncating Variants in TREM2 present in more than 1 individual.**

Each haplotype is represented as a row and each SNP is a column. Haplotypes are colored according to the ancestral origin of the variant, showing the areas where the carriers are identical by descent (IBD). Red: African origin, Blue: European, Green: Native American. Darker shaded haplotypes correspond to individuals from the TANGL cohort, and lighter shaded haplotypes correspond to individuals from the African or European cohorts of the 1000GP. Mb: Megabases, cM: Centimorgans

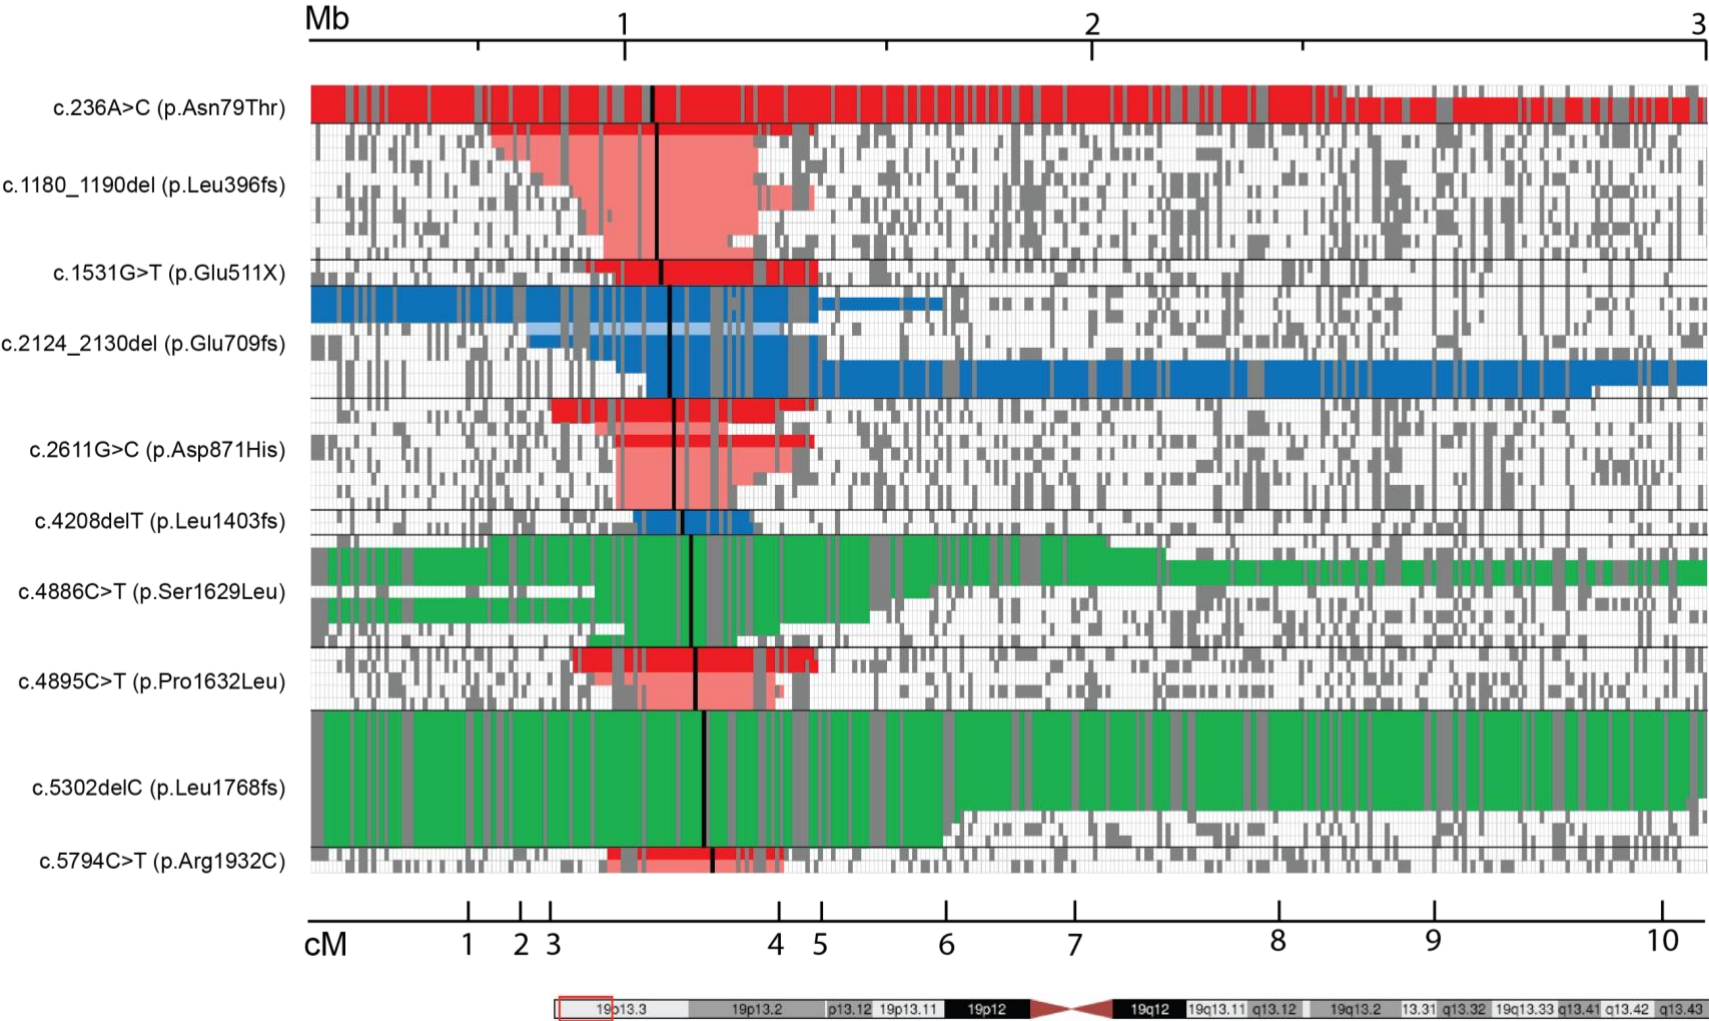

**Figure S38**  
**Alignment of the haplotypes that carry Strictly Damaging and Protein Truncating Variants in ABCA7 present in more than 1 individual.**

Each haplotype is represented as a row and each SNP is a column. Haplotypes are colored according the ancestral origin of the variant, showing the areas where the carriers are identical by descent (IBD). Red: African origin, Blue: European, Green: Native American. Darker shaded haplotypes correspond to individuals from the 1TANGL cohort, and lighter shaded haplotypes correspond to individuals from the African or European cohorts of the 1000GP. Mb: Megabases, cM: Centimorgans

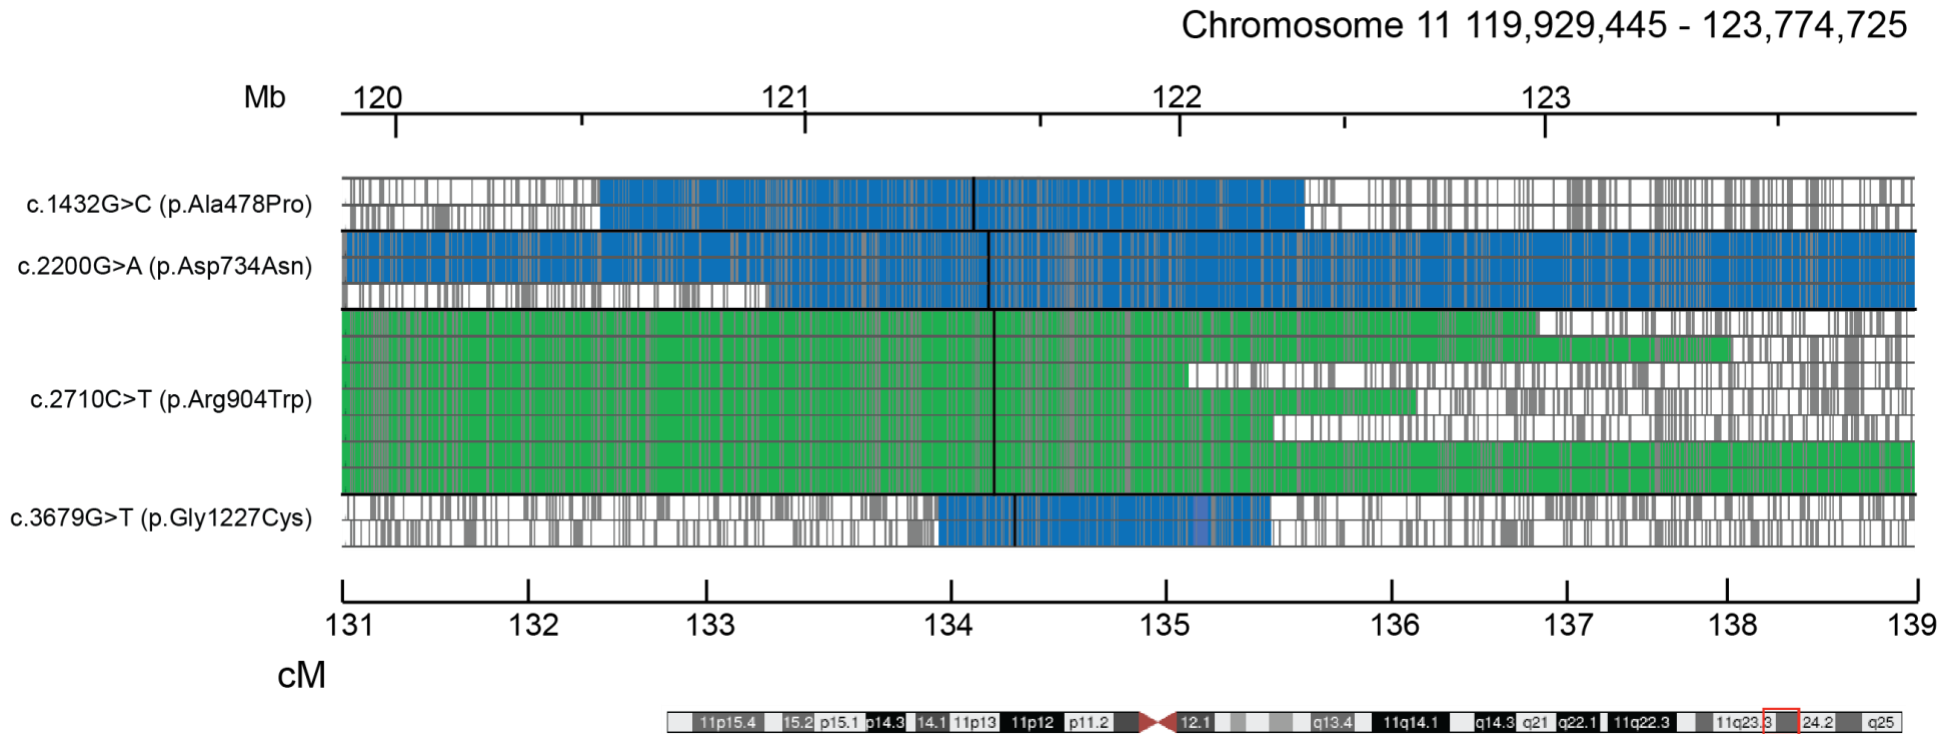

**Figure S39**

**Alignment of the haplotypes that carry Strictly Damaging and Protein Truncating Variants in SORL1 present in more than 1 individual.**

Each haplotype is represented as a row and each SNP is a column. Haplotypes are colored according the ancestral origin of the variant, showing the areas where the carriers are identical by descent (IBD). Blue: European, Green: Native American. Aligned shaded haplotypes correspond to individuals from the TANGL cohort. Mb: Megabases, cM: Centimorgans

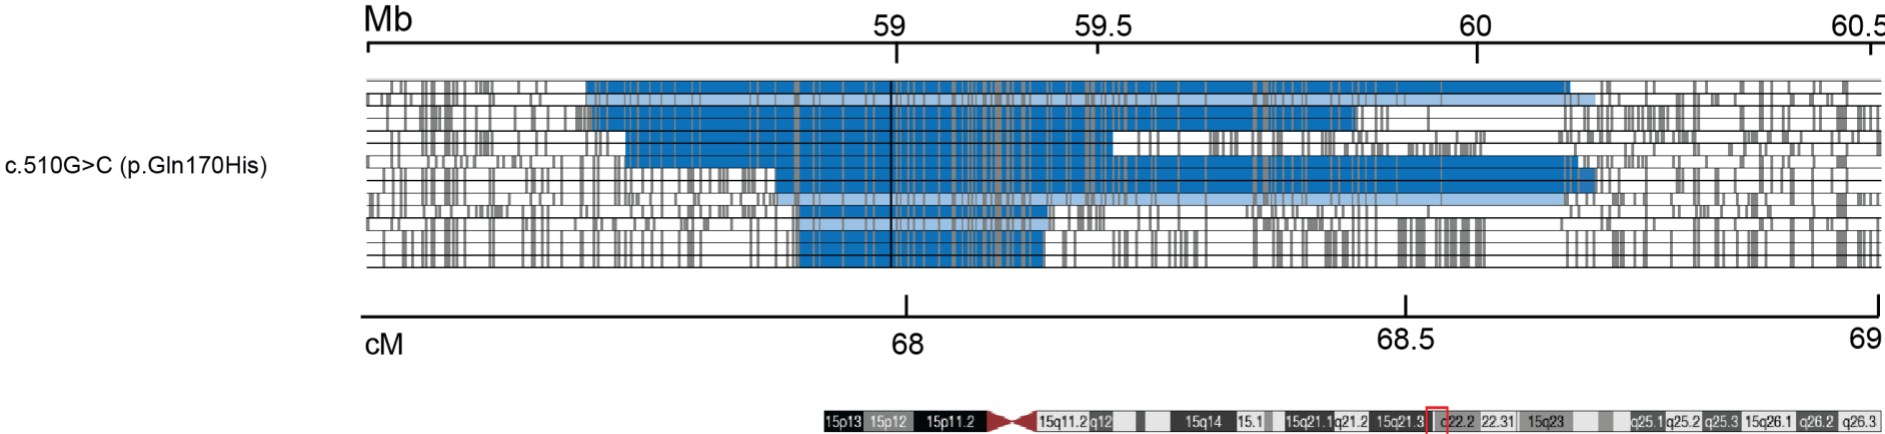

**Figure S40**  
**Alignment of the haplotypes that carry Strictly Damaging and Protein Truncating Variants in ADAM10 present in more than 1 individual.**

Each haplotype is represented as a row and each SNP is a column. Haplotypes are colored according the ancestral origin of the variant, showing the areas where the carriers are identical by descent (IBD). Blue: European. Darker shaded haplotypes correspond to individuals from the TANGI cohort, and lighter shaded haplotypes correspond to individuals from the European cohort of the 1000GP. Mb: Megabases, cM: Centimorgans



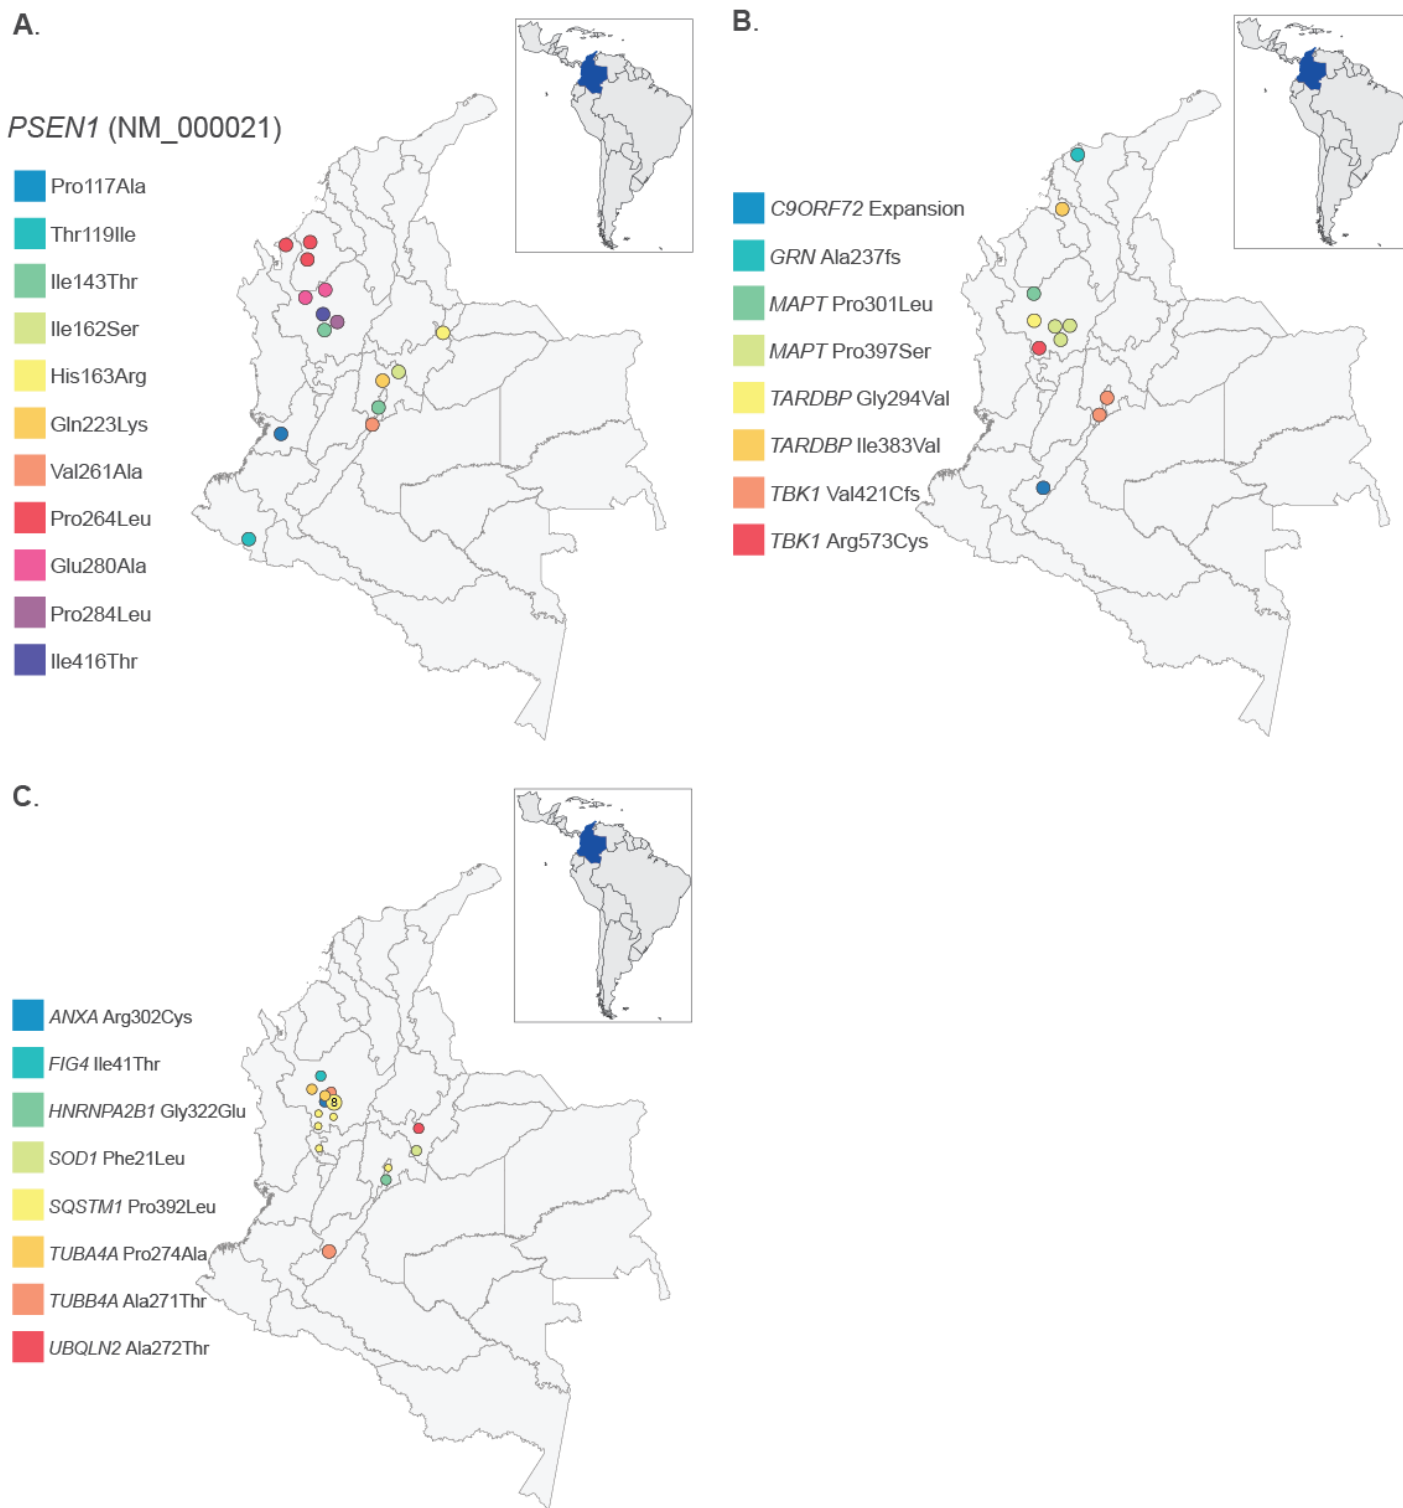

**Figure S41**

**Maps of Colombia representing the place of origin of the families with disease causing variants.** Numbers inside circles represent numbers of families carrying the variant who are original from the same geographic region.
